# Supplementary material for: Untargeted metabolomics coupled with genomics in the study of sucrose and xylose metabolism in Pectobacterium betavasculorum
Source: Front Microbiol. 2024 May 15;15:1323765. doi: 10.3389/fmicb.2024.1323765 (PMC11133636; doi:10.3389/fmicb.2024.1323765)
Supplement: Supplementary file 1 [file Table_1.XLS]

## Sheet: Table S1
Table S1. Exopolysaccharides (EPS) biosynthesis test by P. betavasculorum strains on media supplemented with various sugars.
strain\medium	glucose	mannitol	sucrose	galactose	xylose	maltose	ribose	rhamnose	isomaltulose
B2	-	-	+++	+	+++	++	-	-	-
B5	-	++	+++	-	+++	++	-	-	-
B6	-	++	+++	-	+++	++	-	-	-

## Sheet: Table S2
Table S2. The results of the metabolomic analysis of the biomass extracts of P. betavasculorum grown in the MS medium supplemented with 1% sucrose or 1% xylose. The results for three replicate samples of three consequtive experiments were shown.
Compound	SB1A	SB1B	SB1C	SB2A	SB2B	SB2C	SB3A	SB3B	SB3C	KB1A	KB1B	KB1C	KB2A	KB2B	KB2C	KB3A	KB3B	KB3C
(-)Quinic acid	4461	8908	844624	3336	8299	2841	7061	14136	3692	8203	6191	3095.5	3423	4109	4411	1609	2683	6039
1,6-Anhydro-2,3-O-isopropylidene-á-D-mannopyranose	3851	12467	6666	7148	5217	3151	4500	8867	2250	40443	11006	8433	1080.5	10852	2161	2817	8428	3674
2,5-Dihydroxybenzoic acid	7202	5866	2933	2732	4805	3571	4007	12053	2003.5	5524	2762	10563	3016	4596	9973	1109	3785	2218
2-[(Trimethylsilyl)oxy]propan-1-ol	3381608	3829765	6190978	6295098	9540791	11280045	2924717	3605616	4903040	1	1	1	1	1	1	1	1	1
2-Deoxy ribose O,O',O''-tris(trimethylsilyl)-	27408696	7 412 055,5	14824111	15262797	95888160	11726176	14212451	11937999	10218517	1	1	1	1	1	1	1	1	1
2-Ethoxyethanol	1	20833	1	5709.5	17423	11419	165000000	171000000	180000000	1	1	43601	82838928	41 419 464	101000000	1	1	154000000
2-Methoxyethanol, triisobutylsilyl ether	75918032	20986420	137000000	57407648	137000000	74041104	8700660	205000000	139875	6099	1674577	12998	6 450,5	44963	12901	1	29968	1
2-Methyl-4-trimethylsilyloxy(trimethylsilyl)butyrate	13828696	15554543	19524668	44337304	31808382	22567304	1399102	699 551	8567915	1	1	1	1	1	1	1	1	1
3,6,9-Trioxa-2,10-disilaundecane, 2,2,10,10-tetramethyl-	19 695 716	39391432	64906804	57610240	82917872	105000000	44485680	48399568	22 242 840	1	1	1	1	1	1	1	1	1
3,8-Dioxa-2,9-disiladecane, 2,2,9,9-tetramethyl-5,6-bis[(trimethylsilyl)oxy]-, (R*,S*)-	19229444	9 614 722	203000000	295000000	1	1	181000000	504000000	147000000	1	1	1	1	1	1	1	1	1
3-Hydroxydodecanoic acid	47527	23 763,5	5390192	5 297	10594	52567	8302	1	1	1	1	1	1	23971	1	1	1	1
3-à-Mannobiose, octakis(trimethylsilyl) ether (isomer 2)	1	1	1	1	1	1	1	1	1	1	1	1250000000	633000000	1330000000	817000000	1040000000	911000000	817000000
5-Ethyl-1,3-dioxane-5-methanol	26029	79265	52604	83102	1	1	14663	27759	7 331,5	62388	119882	31 194	9 697,5	37347	19395	1	1	1
5-Hydroxy-L-tryptophan	52229144	2 679 093,5	5358187	1224414	56353164	10249630	170708	17076608	225000000	1	1	1	1	1	1	1	1	1
7-Methylguanosine	4730	3889	3889	4546	1 515,5	3031	1	4486	1	5013	2 141	4282	1	1	2948	1 188,5	3913	2377
8,10-Dioxaheptadecane	16923930	5 986 026	11972052	8478079	13092728	18829758	15746470	14148806	17007592	1	1	1	1	1	1	1	1	1
Arabinofuranose, 1,2,3,5-tetrakis-O-(trimethylsilyl)-	1	1	7079265	1 706 505,5	11583233	3413011	270736	135 368	1221836	1	1	1	7215920	1	1	1	1	1
Benzaldehyde, 3-fluoro-4,5-dihydroxy-	6667148	9085802	7468066	2290850	10954319	4925964	7192795	7434622	8240971	1	1	17982	1	1	1	1	1	1
Butane, 1,2,3-tris(trimethylsiloxy)-	130003576	65 001 788	119000000	91878904	369000000	338000000	72364896	89095120	91011560	1	1	1	1	1	1	1	1	1
Butane, 1,2,4-tris(trimethylsiloxy)-	1 397 128,5	2794257	20139752	10762567	10939261	39344440	7991701	8337280	3 995 850,5	1	1	1	1	1	1	1	1	1
cis-Aconitic acid	5734	25746	5964	3229	5898	5069	3463	6614	1 731,5	6518	10817	8573	3492	9760	7481	674	5937	1348
D-(+)-Galactopyranose, pentakis(trimethylsilyl) ether (isomer 2)	474685	624117	554952	3373107	1	1	700303	350152	1185109	1	1	1	1	1	8546266	1	1	1
D-(+)-Talofuranose, pentakis(trimethylsilyl) ether (isomer 2)	1734283	3277138	16044948	7318708	1	1	1	1	3130492	1	1	161000000	79223144	147000000	39 611 572	33081028	16 540 514	63388976
D-(-)- Erythrofuranose, tris(trimethylsilyl) ether (isomer 2)	22896184	595000000	110000000	38 355 876	76711752	184000000	8454970	2337213	4802099	1	1	1	1	1	1	1	1	1
D-(-)-Fructose, pentakis(trimethylsilyl) ether, methyloxime (anti)	1	1	1	118000000	157000000	1	1	1	1	184000000	1390000000	1340000000	557000000	397000000	496000000	562000000	498000000	403000000
D-(-)-Lyxofuranose, tetrakis(trimethylsilyl) ether	6492661	242000000	156000000	173000000	148000000	8375265	622000000	415000000	698000000	135000000	136000000	439000000	487000000	353000000	325000000	326000000	229000000	104000000
D-(-)-Ribofuranose, tetrakis(trimethylsilyl) ether (isomer 1)	58687108	23201452	11 600 726	1 437 045 505	2870000000	320000000	206000000	92809336	49347176	980000000	419000000	600000000	499000000	307000000	264000000	388000000	85113448	51231172
D-(-)-Ribofuranose, tetrakis(trimethylsilyl) ether (isomer 2)	189766384	90898808	442000000	93445088	338000000	284000000	39641204	81198352	37877752	21965498	313000000	188000000	24606876	20878612	18554064	114000000	11367443	7282681
D-(-)-Tagatose, pentakis(trimethylsilyl) ether, methyloxime (anti)	1	1	155000000	224000000	166000000	292000000	1	1	1	33170004	46050272	135000000	42760936	27819892	28034828	14857771	17397204	9009539
D-Arabinose, tetrakis(trimethylsilyl) ether, methyloxime (syn)	3208000000	2460000000	6287823	4140000000	2850000000	1660000000	491 719 390	908000000	983000000	283000000	181000000	152000000	130000000	141000000	70 605 296	24 751 172	49502344	66069400
D-Arabinose, tetrakis(trimethylsilyl)-	1574086	13274377	931927	1023294	146000000	199000000	18 814 694	37629388	1210000000	1	1	1	1	1	1	1	1	1
D-Fructose, 1,3,4,5,6-pentakis-O-(trimethylsilyl)-, O-methyloxime	1	1	55220840	392000000	9212548	106000000	1	107000000	1	758000000	11923701	12548064	1	1	1197704	1	1	1
D-Xylose, tetrakis(trimethylsilyl)-	308337120	27477192	57216140	113000000	7622691	69187080	222000000	172000000	252000000	1	1	1	1	1260637	1166799	1	757682	1
Dimethyl sulfoxide	35108	9826	19652	8997	53022	4498.5	21473	23695	25209	22418	28628	39941	22861	11562	10473	18617	26368	20014
DL-3-Aminoisobutyric acid	19207244	18120058	17802784	27949	71713968	4998	14051	25208	23941	35482	27564552	31112	77848192	31054484	171000000	42397	30153654	91980448
DL-Arabinose, tetrakis(trimethylsilyl) ether, methyloxime	2183000000	1870000000	4200000000	176000000	2560000000	2480000000	117000000	462000000	523000000	281000000	22418060	18453376	1	93414824	1	11 301 218	38218872	22602436
DL-Malic acid	4505	7846	16712	9606	6962	3481	6051	10586	3020.5	3305.5	6611	13599	1	1	4036	1	6973	1
Erythro-Pentonic acid, 2-deoxy-3,4,5-tris-O-(trimethylsilyl)-, trimethylsilyl ester	13426931	6 713 465,5	299000000	156 420 544	313000000	484000000	335000000	1180000000	1090000000	1	1	1	1	1	1	1	1	1
Ethanol, 2,2'-oxybis-	1	15762	1	1	98061	1	1	67822	1	34472	1	1	1	36223	1	1	1	1
Ethyl 2,3,4,6-tetrakis-O-(trimethylsilyl)-D-glucopyranoside	7431276	1902387	1477488	510446	1	1	756 198,5	1512397	4938596	1	1	1	1	1	1	1	1	1
Glucopyranose, 1,2,3,4,6-pentakis-O-(trimethylsilyl)-, D-	443524	1540865	87375192	3404196	1	1	666841	333420	566878	1	1	1	1	1858282	1	1	1	1
Glycerol, tris(trimethylsilyl) ether	7385723	4968160	1884336	9706075	6184770	2193395	2504088	1578841	3381015	1	1	1	1	1	1	1	1	1
Glyoxime, bis(trimethylsilyl)-	21161732	10 413 736	20827472	6601979	14173502	22125166	28435856	1061256	530 628	1	1	1	1	1	1	1	1	1
Itaconic acid	4068	11304	2034	5457	1629	3258	21832	10528	405	9542	6321	7824	2987	8154	5053	1935	3381	3446
L-(+)-Rhamnopyranose, tetrakis(trimethylsilyl) ether	154884352	115000000	13672344	86121440	122000000	128000000	121000000	26220962	12046612	1	1	1	1	1	1	1	1	1
L-(+)-Threose, tris(trimethylsilyl) ether (isomer 2)	2743669	2829802	5224382	78336424	7147193	3906729	580776	2824048	2615463	1	1	1	1	1	1	1	1	1
L-(-)-Sorbofuranose, pentakis(trimethylsilyl) ether	1	1	5576980	1066206	279787	129771	1	1	270651	1	1	1	1	1	1	1	1	1
L-Fucitol	5276	9907	3737	3624	35925	3368	4344	5919	2172	12063	5084	14606	2747	3132	7256	1	3395	3533
Levoglucosan, tris(trimethylsilyl)-	958596	479 298	3210000000	94964224	27332932	280055	3535321	1928872	2136681	134000000	107000000	124000000	77949208	72676304	98583368	86529288	59446940	57286976
Lysine	8747	17494	44091	1	26538	1	5569	131564	2784.5	1	1	1	1	1	13164	1	1	1
Lyxopyranoside, methyl 2,3,4-tris-O-(trimethylsilyl)-	3916236	304000000	7832472	193000000	144000000	97693376	10588882	1115698	590000000	1	1	742478	1	1	1	1	1	1
Mannose, 6-deoxy-2,3,4,5-tetrakis-O-(trimethylsilyl)-, L-	523396	3001695	2870269	1211416	6967407	545230	1713050	3695209	800534	1	1	1	1	1	1	1	1	1
meso-Erythritol, tetrakis(trimethylsilyl) ether	119971080	1	1	1	1	387000000	118000000	25015312	50030624	1	1	1	1	1	1	1	1	1
Methapyrilene	14087	10953	37270	6171	1656371	128000000	4478	11346	8956	52758	9138	27520	60029	10985	12365	55838924	10913	3111
Myo-Inositol, 1,2,3,4,5,6-hexakis-O-(trimethylsilyl)-	11290291	2880135	90933984	69949392	157997	9606217	18013464	2940157	4913960	1383597	1050000000	2767194	779845	389922	7367387	836000000	1	1
N-Acetyl-L-alanine	4783	8410	2743	2932	4671	4324	10336	7775	3887.5	7296	6855	7206	1675.5	3486	3351	1	4192	1
N-Acetylaspartylglutamic acid	4236	6978	14904	4235	6145	2117.5	4480	1	1	49241632	4335	8670	1	1	5713	1	3485	1
N-Formylglycine	10258	38563	1041	2642	15165	1321	105541	6545.5	13091	22438	23781	25954	8054	10926	6218	15882	13232	15309
N-à-(tert-Butoxycarbonyl)-L-Phenylalanine	5107	6873	17943	4603	4117	2058.5	1	9709	1	9038	4520	4901	1	1	6093	1965	4041	3930
Oleamide	7478	14172	13309	5441	2911	7727	3189.5	6379	27586	6269	32197	12538	23459	1281	5177	3908	13875	7816
Pentadecanoic acid, tert-butyldimethylsilyl ester	20546724	2 940 284	5880568	40609.5	81219	31576148	245534	491067	20721458	1	1	1	1	1	1	1	1	1
Phenylacetic acid	2156	4726	1078	2121.5	4243	4663	1	7259	1	1	1	1	1	1	1	1	1	1
Ribitol, 1,2,3,4,5-pentakis-O-(trimethylsilyl)-	1136000000	567 977 600	3190000000	1660000000	828 505 280	2961595	873000000	1210000000	1790000000	1	1	1	1	1	1	1	1	1
Sucrose, octakis(trimethylsilyl) ether	812943	1	1696006	1	1	1	1	1	1	71014232	78723184	42015288	10533789	7785298	4591216	13475888	3848327	15866541
Vitamin E acetate	24139	1	1	14465.5	28931	47277	1	1	45225	1	1	1	1	1	1	1	1	1
à-D-Glucopyranoside, 1,3,4,6-tetrakis-O-(trimethylsilyl)-á-D-fructofuranosyl 2,3,4,6-tetrakis-O-(trimethylsilyl)-	1	1	1	1	1	1	1	1	1	1000375	1808639	1879426	371877	232204	11327299	294443	286343	143 171,5
à-D-Mannopyranose, 1,2,3,4,6-pentakis-O-(trimethylsilyl)-	602098	301049	636116	338211	179480	936135	1	1	411822	1	1	1	1	1	1	1	1	1
à-L-Galactofuranose, 6-deoxy-1,2,3,5-tetrakis-O-(trimethylsilyl)-	159008832	79 504 416	182000000	152000000	80665648	206000000	504000000	383000000	351000000	1	1	1	1	1	1	1	1	1
à-l-Galactofuranoside, methyl 6-deoxy-2,3,5-tris-O-(trimethylsilyl)-	10585.5	183675	21171	8485437	1	1	60434.5	14575319	120867	13847023	37513912	1957950	1888407	11832413	1402931	24908516	5240131	2 620 065,5
á-L-Arabinopyranose, 1,2,3,4-tetrakis-O-(trimethylsilo)-	36857744	3373238	66416660	4083694	8769217	21689252	23260428	19275012	25224340	1	1	874891	1	1	1	1	1	1
2-Hydroxyisocaproic acid, trimethylsilyl ester	3886578	47710976	21702472	617000000	717000000	51024240	30354320	50075584	21645912	1	1	1	1	1	1	1	1	1
4,4'-Diaminodiphenyl sulfone	13068980	1	1	1173624	586 812	1979105	1	47077	1	1	1	1	1	1	1	1	1	1
Creatinine	3368	18332	3975	15431	9251	5266	8077	9542	1606	10057	5045	8033	1749	6409	3832	1273	4000	2546
D-Ribofuranose, 1,2,3,5-tetrakis-O-(trimethylsilyl)-	632612540	201000000	97690168	17 920 464	35840928	234000000	85 538 656	559000000	171000000	821000000	88250648	291000000	12676020	1	1	1	1	1
d-Ribose, 2,3,4,5-tetrakis-O-(trimethylsilyl)-, O-methyloxime	1	1	64425188	402000000	200 997 872	288000000	135 387 664	729000000	271000000	1	1	1	1	1	1	1	1	1
Formic acid, 1-methylethyl ester	7853	15706	58060	28095	24048194	107313	1	8679	1	17618	1	1	1	1	93328712	1	1	1
Glycyl-L-norleucine	1	1	4681446	426513	108 239,5	216479	1	92475	1	1	1	1	1	1	1	1	1	1
Gulose, 2,3,4,5,6-pentakis-O-(trimethylsilyl)-	11170710	5 585 355	19173548	14309368	14699309	8668756	4956565	7266328	9644634	1	1	1	1	1	1	1	1	1
Hydrocortisone	7503	9131	3751.5	1	1	1	1	12299	1	11617	8637	21372	4227	20259	8454	3041	10667	6082
Inositol, 1,2,3,4,5,6-hexakis-O-(trimethylsilyl)-, scyllo-	2480317	10754795	70414472	186000000	2 784 668	5569336	20372808	724928	362 464	2340000000	375000000	1690000000	1490000000	1120000000	923000000	993000000	1210000000	582000000
L-5-Hydroxytryptophan	10353	5176.5	14435	6631	1	1	1	75077	1	5516	11032	15278	1	1	24777	1	1	1
Maleic acid	1	1	11109	1	1	16017	1	15463	1	1	1	1	1	1	1	1	1	1
N-Acetyl-D-glucosamine	13048	8472	13089775	6149112	132000000	847692	8222	16444	1677904	14947	11323	9844	4266	5907	6444	1601	7330	3202
Serine, N,O-bis(trimethylsilyl)-, trimethylsilyl ester	64960112	32 480 056	55768300	41 898 888	101000000	83797776	187000000	8543683	53546668	1	1	1	1	1	1	1	1	1
Sphingosine 1-phosphate	3170	6525	11876	1	9771	1	2824	5200	1412	13027	3747.5	7495	1	1	4336	1	1	60790
trans-3-Hydroxycinnamic acid	1	1	50126	1	3760	1	1	18879	1	1	14205	31842	11974	1	1	1	1	1
trans-Aconitic acid	5913	9489	7063	6941	9756	2852	8980	6144	1890	14585	20420	12980	4914	5105	21046	2174	4348	5441
1-Buten-3-yne	99071	1	1	8827	99852	17654	1	1	96844	53597	1	12829	8227	1	1	1	1	1
2-(4-Methoxyphenyl)-2-(4-trimethoxysilyloxy)propane	32289458	8 564 152	17128304	1	25279328	1	1	1	2473676	13880830	16066019	8441655	1	1	1	2286021	1	1
2-Propenoic acid, 2-[(trimethylsilyl)oxy]-, trimethylsilyl ester	2106529	1	1	1	1	5094511	1	1	4543894	1	1	1	1	1	1	1	1	1
cis-4,7,10,13,16,19-Docosahexaenoic acid	8178	10847	489	2008	1	1	7643	1	1	1	1	1	1	1	1	1	1	1
Propanedinitrile, (acetyloxy)methyl-	352541	176 270,5	6860968	183621	495933	668485	1	1	18596	1	1	1	1	1	1	1	66454	1
Vitamin B12	40383	1	1	38618	59140	14309	3850	1	1	1	1	1	1	1	29847	1	1	1
L-Threitol, tetrakis(trimethylsilyl) ether	2 166 293	106000000	4332586	1 010 676	2021352	52472208	1	1	1440000000	1	1	1	1	1	1	1	1	1
Didecyl phthalate	1	1	1	1	1	1	8429	1	1	5 055,5	10111	38121	17832	1	1	1	1	2443
D-(-)-Lyxose, tetrakis(trimethylsilyl) ether, trimethylsilyloxime (isomer 1)	1	1	1	1	1	125000000	1	1	1	14 693 911	14 693 911	29387822	45841872	31125984	39683924	13195201	17669110	6 597 600,5
Xylitol, 1,2,3,4,5-pentakis-O-(trimethylsilyl)-	1	1	1	1	1	1	1	1	1	83370952	26630460	48842132	22278464	44142724	32068892	9069043	12258159	4 534 521,5
Sb - growth in the presence of sucrose
KB - growth in the presence of xylose

## Sheet: Table S3
Table S3. The results of the metabolomic analysis of the media extracts of P. betavasculorum culture grown in the MS medium supplemented with 1% sucrose or 1% xylose. The results for three replicate samples of three consequtive experiments were shown.
Compound	S1	S2	S3	S4	S5	S6	S7	S8	S9	K1	K2	K3	K4	K5	K6	K7	K8	K9
1-(1Z-octadecenyl)-2-(9Z-octadecenoyl)-sn-glycero-3-phosphocholine	6961	7619	17703	9969	11726	38600	9990	9958	7607	7940	8855	14092	8996	11617	9452	3976.5	3976.5	7953
1,1,1-Tris(hydroxymethyl)propane, tris(trimethylsilyl) ether	227041712	63409240	135354464	8747154	17494308	18415464	20883202	29452908	11797683	1	1	1	1	1	1	1	1	1
1,16-Cyclocorynan-16-methanol, 17-(acetyloxy)-19,20-didehydro-10-methoxy-, acetate (ester), (19E)-	1	1	1	6374797300	1	1	9591538700	7324488700	6047676400	1	1	1	1	1	1	1	1	1
1,2-Bis(trimethylsiloxy)ethane	1	1	1	126162688	670017	335008	1	1	12330549	1	1	1	1	1	1	1	1	1
-1,2-propanediamine	1	1392798	1	1	1	1	414648	1	1	23324	11662	11662	5471955	1107685	19117	378758	189379	189379
1,3,5-Triazine-2,4,6(1H,3H,5H)-trione, 1,3,5-trimethyl-	1	1	1	592360	222153	111076	1	1	3530677	3118156	7073248	659567040	20756060	142676320	10378030	404268800	271530272	386040800
1,5-Anhydro-D-sorbitol, tetrakis(trimethylsilyl) ether	2665035260	147732016	539519740	2485925890	15610334	51630976	118527424	27351488	84605920	1	1	450370880	617714240	1	1	1	117781200	1
15(S)-Hydroxy-(5Z,8Z,11Z,13E)-eicosatetraenoic acid	4089.5	8179	369917728	5900	32844	4206	79743376	7726	3863	26584	1	1	5768	35611	11536	1	11276	1
1H-Benzimidazole, 1-(2-phenylethenyl)-, (E)-	795916800	1814031360	1591833600	1	1	1	1	1	33963	1	1	1	1	1	1	1	1	13801
1-Sulfanylurea	12120	18019	17071	8864	9224	28423	7973	12895	4897	11664	875255	20003	71652	19828052	17148	39946	16749	15397
2-((5-Benzyl-4-methyl-4H-1,2,4-triazol-3-yl)thio)-N-(4-sec-butylphenyl)acetamide	13067	1	1	1	15227	1	5361	2680.5	21160	11717	8028	4014	5122	9114	15513	1	16885	1
2-Aminothiophenol	284882	258941	48878	1	1	1	144958	171690	182074	49970	1	1	1	1	1	1	1	39585
2-Deoxy ribose O,O',O''-tris(trimethylsilyl)-	1	1	26138646	4546322	9092644	10538707	6119279	32058856	19045182	1	1	1	1	1	1	1	1	1
2-Hydroxyisocaproic acid, trimethylsilyl ester	51651368	13558664	25825684	39524776	79049552	82992624	20152122	20146624	76751248	24158340	1	1	3787872	4856071	30033424	1.11582e+06	14086815	2231637
2-Methoxyethanol, triisobutylsilyl ether	390797760	15403305	95881976	53652264	191424992	103201576	130395616	1778352	221566640	1	1	1	1	1	644867	22213.5	44427	619852
2-Oxo-4,6-diphenyl-1,2-dihydropyrimidine	2963689	18576656	14788416	44072928	3736050	7472100	1	1	2156896	1	1	1	1	1	1	1	1	1
3-(2-Hydroxyethyl)indole	2649	68522	5124	11326	16848	27077	4959	15118	7991	13729	6767	8665	28988	6642	76314	33004	13837	8431
3-Hydroxydodecanoic acid	44336	86788	176967	53184	25118	12559	29832	127600	196580	50361	25180.5	108291	10967	47451	21934	14496	1	1
3-Methoxy-4-Hydroxyphenylglycol sulfate	1	1	6762	1	1	7098	12882	2892	5784	57443	8074	9928	14289	4992	9984	10233	7878	7560
4-Hydroxycoumarin	236075616	1149263360	113534072	347556672	375209920	140979024	364748032	621586050	757502460	1	1	1	1	1	1	1	1	1
4-Imidazoleacrylic acid	210003	52354	112108	50702	25351	136033	7533	3766.5	118893	1	17815	1	1	1	1	137209	1	1
4-Methyl-2,4-bis(4'-trimethylsilyloxyphenyl)pentene-1	28199	12477	24954	1	1	1	1	1	432565	28449.5	23734512	56899	1	1	11323	16909	30388	1137636
5-Hydroxy-L-tryptophan	1	1	1	21151	70023	10575.5	1	1	1	1	25878788	1	8603.5	8839378	17207	142031	7165.5	14331
5-Methoxypsoralen	17270	11267	22534	1	1	47468	75658	12519899	151316	127465960	102134	204269	5632526	2816263	76449472	1	232643568	1
7-Methylguanosine	8764.5	17529	8764.5	19755	9324	4662	3255	6510	12439	8702	24572	4351	13281	46215	9334	10645	9920	9606
á-D-(+)-Mannopyranose, pentakis(trimethylsilyl) ether	1318012160	1185971070	1670120700	128942440	5747947	7981901	35490136	187697616	233841280	99695880	528929	1057858	12881190	1852259	112361880	30164	311738560	15082
Adenosine	7059	27111	3529.5	4837	2418.5	5966	9126	12335	8894	4077	6874	17342	6195	7505	8208	12448	3004	1502
Adenosine 2',3'-cyclic monophosphate	63324	32772	282843	188496	94248	425294	9105.5	18211	241907	1	1	1	804811	47649	35561	9198	7661	3830.5
á-D-Galactofuranoside, ethyl 2,3,5,6-tetrakis-O-(trimethylsilyl)-	224722	1	1	50246	9919695	15593557	145718	291437	2654656	1	1	1	1	1	1	1	1	1
à-D-Glucopyranoside, 1,3,4,6-tetrakis-O-(trimethylsilyl)-á-D-fructofuranosyl 2,3,4,6-tetrakis-O-(trimethylsilyl)-	37144376	154843456	225955200	22387608	4744420	39277712	708496190	39180020	207534448	1453690	1	1	1	1	2233384	1	1	1
à-d-Glucopyranoside, methyl 2,3,4-tris-O-(trimethylsilyl)-, hexadecanoate	228968688	1	1	83925048	1	1	8515986	17031972	101450368	36339536	1	1	1	1	14887353	1	1	1
Adipic acid	10151	65244	20302	159665	238001	31019	13876	25500	96368	39803	49167	57418	13233	22079	21090	160273	29808	19348
à-D-Mannopyranoside, methyl 2,3,4,6-tetrakis-O-(trimethylsilyl)-	1	1	1	1	1	1	1	1	1	62837972	18175404	72256216	24668812	16124815	17578640	12081568	51502528	24163136
á-L-Arabinopyranose, 1,2,3,4-tetrakis-O-(trimethylsilo)-	1	1	1	1	1	1	1	1	1	2767998	1383999	1383999	35804944	82178968	5083806	882151	4703246	231308624
à-L-Galactofuranose, 6-deoxy-1,2,3,5-tetrakis-O-(trimethylsilyl)-	40888908	37407548	56125440	1	13791341	1	1	1	100258560	161929488	5439243800	5237909500	7976460300	2845483780	33158920	2896305660	2604578	1044731900
à-l-Galactofuranoside, methyl 6-deoxy-2,3,5-tris-O-(trimethylsilyl)-	2135490	12521435	32275388	1646095	52087024	11774808	22229368	625411	12683050	13750785	3471136	977168	87329728	40477904	20238952	232842752	21884516	10942258
Arabinofuranose, 1,2,3,5-tetrakis-O-(trimethylsilyl)-	31821754	62175528	137441760	1275069	42502556	23011904	41314768	19582368	6250961	1	1	385735	1	490889	1	1	1	1
Arginine	1	1	19954	1	1	1	79772	1	1	14075	7037.5	21010	6553	13106	15350	4309.5	4309.5	8619
Butane, 1,2,4-tris(trimethylsiloxy)-	1	1	1	1	1	3942981	13817731	2852279	12008273	10649292	1	1	1	1	23463784	1	1	1
Chizo-Inositol, per(trimethylsilyl) ether	923570050	322050112	897601410	803984580	4538641	2.26932e+06	953769280	1176443140	848131650	1159342720	8263301	1389168	617998590	1310691330	2170214660	580424	1160847	3102197
cis-13-Docosenoic acid	249220	3999243	6023046	76067	248440	152134	1	1	156600352	1	1	1	3866.5	7733	1169236	1	1	1
Creatinine	3589	4130	21602	12339	6946	10690	7432	17553	9809	28600	45651	14300	26373	47635	33798	24735	13890	20097
D-(-)- Erythrofuranose, tris(trimethylsilyl) ether (isomer 2)	1	1	1	1	1	15510423	1	1	9603082	685459140	20625832	41251664	222948480	17858684	641242940	8417686	23860828	4208843
D-(-)-Fructose, pentakis(trimethylsilyl) ether, methyloxime (anti)	92581232	102382816	170557616	160981728	85474224	80355136	342925952	136238400	107868728	1	1	1	1	1	1	1	1	1
D-(-)-Lyxofuranose, tetrakis(trimethylsilyl) ether	6055280	21013220	5806461	36666280	7608324	39019720	4826265	4083758	19272616	473931	14084637	12592033	16042266	50358592	867757950	25395742	8695272	16213574
D-(-)-Lyxose, tetrakis(trimethylsilyl) ether, trimethylsilyloxime (isomer 1)	367524768	242374288	435209792	79704768	158040816	366364416	1	1	1	137403184	1994866	997433	1	1	132215312	1	1	1
D-(-)-Ribofuranose, tetrakis(trimethylsilyl) ether (isomer 1)	1108486	2715092	7863740	883069	3785384	6499652	14762792	22286490	23720876	35361288	10968321	3232787	26949008	50253780	4429742	67299832	28226366	14531596
D-(-)-Ribofuranose, tetrakis(trimethylsilyl) ether (isomer 2)	1789903	679392	3889385	1.4802e+06	4514549	2960409	1882810	1070947	10352154	175436816	21234720	10617360	12586954	9678577	84206184	2867022	12033353	13962920
D-(-)-Tagatose, pentakis(trimethylsilyl) ether, methyloxime (anti)	845502400	318922752	371149376	93210816	20457950	479106432	282075104	208136256	606631680	1	1	1	1	1	1	1	1	1
D-(+)-Galactopyranose, pentakis(trimethylsilyl) ether (isomer 2)	415107616	282706944	303773632	375420352	108048600	49647728	141322272	59066448	173839152	1625609	1	1	8010072	3501514	22053964	1	163750656	1
D-(+)-Galactose, pentakis(trimethylsilyl) ether, benzyloxime (isomer 1)	1652232450	1361341950	680670975	11979104	2530299140	1301326210	49523980	31430328	346870336	1	1	1	1	1	1	1	1	1
D-(+)-Glucuronic acid ç-lactone, tris(trimethylsilyl) ether, methyloxime (anti)	1	1	1	1	15128544	1	119062568	103615832	197572400	1	1	1	1	1	1	1	1	1
D-(+)-Talofuranose, pentakis(trimethylsilyl) ether (isomer 2)	18108344	38541224	18318314	35802160	13315918	22347932	68261456	3032811780	163426128	46952240	2.11541e+06	4230823	19007020	15931680	26835940	1	3943651	1
D-(+)-Talose, pentakis(trimethylsilyl) ether, methyloxime (syn)	1060415810	1114974850	1298868220	143051504	511345536	394164096	372775584	449578912	519564096	1	1	1	1	1	1	1	1	1
D-Allose, pentakis(trimethylsilyl) ether, trimethylsilyloxime (isomer 1)	748609340	269802528	237588832	1016343300	486952736	405148224	266773856	292094656	426888288	1	1	1	1	1	1	1	1	1
D-Allose, pentakis(trimethylsilyl) ether, trimethylsilyloxime (isomer 2)	2303696130	2765100030	2610180100	312046016	1842628100	748760700	18580082	37961356	37160164	1	1	1	1	1	1	1	1	1
D-Arabinose, tetrakis(trimethylsilyl)-	3976487	74405136	115689576	31683232	46091400	3394611	56021604	48238864	25948730	8480515	519174080	20072394	23234110	24402056	15226996	2585295	649354	629176000
Decylbenzenesulfonic acid	39626	3811	7622	1	10991	1	3461.5	6923	9863	6870	6176	2296	5277	9123	2467	8346	45646	4173
D-Fructose, 1,3,4,5,6-pentakis-O-(trimethylsilyl)-, O-methyloxime	389987	1136943	2273886	1	2189642	1	1	1	1	1	1	20765834	1	1	1	1	1	1
d-Galactose, 2,3,4,5,6-pentakis-O-(trimethylsilyl)-, o-methyloxyme, (1E)-	53653848	1	1	53776044	5732985	520237088	21827932	73545064	1	1	1	1	1	1	1	1	1	1
d-Galactose, 2,3,4,5,6-pentakis-O-(trimethylsilyl)-, o-methyloxyme, (1Z)-	39609352	1063069060	913208960	33971588	16985794	180331280	5214925	16325767	2.60746e+06	1	1	1	1	1	1	1	1	1
DL-3-Aminoisobutyric acid	1767941	3061513	31197960	101856	10985551	50928	3678888	97054	33549620	1519506	22556	46269	24647	1	1	26736	26389360	13368
D-Lactose, octakis(trimethylsilyl) ether, methyloxime (isomer 1)	1345447300	2237894910	2803941120	266729936	1123810560	577987010	1529540220	149870416	197682464	1379355	1	1	1	1	1	1	1	1
DL-Arabinose, tetrakis(trimethylsilyl) ether, methyloxime	1	1	1	1	1	1	1	1	1	5.90415e+06	26318672	11808301	56609748	77027008	989021820	1	11819695	1
DL-Arabinose, tetrakis(trimethylsilyl) ether, trimethylsilyloxime (isomer 1)	1	1	135550592	1140290	286729824	570145	712608	1425216	39998564	1	1	1	1	1	1	1	1	1
DL-Malic acid	13211	6605.5	17851	18543	7146.5	14293	13514	8040	17756	10171	10380	11993	17155	40427	9163	32102	18332	29527
DL-Norvaline	110804	437633	55402	255961	11926	609532	59973	33863	30038	50940	42275	833479	1977885	350196	2279111	190210	95105	166755
d-Mannose, 2,3,4,5,6-pentakis-O-(trimethylsilyl)-, o-methyloxyme, (1E)-	1	1	1	5435362	2717681	2717681	60659260	30529026	61058052	1	1	1	1	1	1	1	1	1
D-Psicofuranose, pentakis(trimethylsilyl) ether (isomer 1)	33609560	81632848	172266560	175588688	78840112	47924068	297368096	195207440	208668144	1	1	1	1	1	1	1	1	1
D-Psicose, pentakis(trimethylsilyl) ether, methyloxime (anti)	54461072	52283948	54815388	14400809	64334980	15916307	41522080	11074787	65471328	1	1	1	1	1	1	1	1	1
D-Psicose, pentakis(trimethylsilyl) ether, methyloxime (syn)	83047184	594621630	21831224	26408232	880515460	294794304	256377584	359360896	442294016	1	1	1	1	1	1	1	1	1
D-Ribofuranose, 1,2,3,5-tetrakis-O-(trimethylsilyl)-	70085984	56589020	60676344	794328	17115150	6233864	176767200	132086968	156489472	36498860	1033681090	564160700	1	1	1	256130960	128065480	354387968
D-Xylose, tetrakis(trimethylsilyl)-	610824380	140415424	482954656	152399456	611147	83204024	55168072	152776544	121436072	8357807	18900188	9139415	10363844	3441752	19750124	8722661	189189840	7179362
Ethyl 2,3,4,6-tetrakis-O-(trimethylsilyl)-D-glucopyranoside	1	1	1	1	1	1	1	1	1	43838224	813596	763101	11162276	3957531	22408004	1047327	142075392	1530418
Galactinol, nonakis(trimethylsilyl) ether	199904064	627160770	570537980	327228960	125774352	107287120	68387480	98572592	117230400	1	1	1	3157543	3758928	1.57877e+06	1	6041598	1
Glucopyranose, 1,2,3,4,6-pentakis-O-(trimethylsilyl)-, D-	161842112	237575488	77428328	184389408	133373200	66686600	80306136	162025840	160612272	2732835	2880275	1.36642e+06	7102899	9848349	3335775	1	2428962	1
Glycerol, tris(trimethylsilyl) ether	1	1	1	1	1	1	1	5489067	1	267708736	535417472	586047040	885479740	887700860	442739870	616255550	1232511100	616255550
Guanine	4089	3068	14525	7000	54240	10478	12136	11734	2540	13260	5074	10148	12857	18648	7211	21505	9873	4936.5
Hypoxanthine, N,O-bis(tert-butyldimethylsilyl)-	34832164	1765210	5214928	1	166590	1	2.15066e+06	4301311	6386837	1	1	1	1	1	1	1	1	1
Indole-3-pyruvic acid	1	1	19838	1	29175	1	1	1	374907	1	1	60103	1	1	1	1	1	1
Inositol, 1,2,3,4,5,6-hexakis-O-(trimethylsilyl)-, scyllo-	37924792	106682224	845583	19411240	3272185	6544370	32579272	94996	40300568	113744016	18041640	11662460	17545728	76854256	1854990	19365326	33614996	19412438
L-(-)-Sorbose, pentakis(trimethylsilyl) ether, methyloxime (syn)	728300930	795448900	364150465	132997328	20555592	413645824	243892432	305891456	408916608	1	1	1	1	1	1	1	1	1
L-(+)-Rhamnopyranose, tetrakis(trimethylsilyl) ether	352936320	156947520	214796192	103926272	50041572	161190944	50749960	210971184	25374980	8187714	48686.5	97373	7917291	1369098	2326582	6940697	243251536	3.47035e+06
L-Dihydroorotic acid	4680.5	9361	12800	94194	11359	3274	45669	36612	22094	11827	5913.5	118855	12341	10742	9797	7382	8856	8335
Levoglucosan, tris(trimethylsilyl)-	6207886	11603916	28647736	22920374	36380448	63102532	55034016	35181656	82757896	5449617900	34765832	18076384	54580496	109160992	2695862020	36594288	30481516	6399755
L-Fucitol	4499	2249.5	31256	11240	12626	17470	10114.5	55175	20229	10952	10057	10788	6081	9621	16108	18776	7264	68663
l-Norvaline, N-ethoxycarbonyl-, undecyl ester	1	1	1	1	1	1	1	1	1	5044	1764	3528	19453	9726.5	34444	1	1	1
L-Threitol, tetrakis(trimethylsilyl) ether	1	1	1	16434903	1	1	1	1	1	470831328	541088770	1405798530	653567620	2570411780	835857410	271969375	543938750	271969375
Lysine	1	1	1	5192998	39655	22221	32147	1	1	14219	7109.5	154290	14924	430486	29848	15368	31161	7684
Lyxopyranoside, methyl 2,3,4-tris-O-(trimethylsilyl)-	1	1	1	1	1	1	1	1	1	33222264	385542624	1279326980	199238512	1063994820	52131204	2125542780	502184128	4692982800
Maltose, octakis(trimethylsilyl) ether, methyloxime (isomer 1)	1401419390	474157856	3735689470	153175696	330037696	244358128	49659740	139057424	31192660	118909	1	1	1	1	996851	1	1	1
Mannose, 6-deoxy-2,3,4,5-tetrakis-O-(trimethylsilyl)-, L-	125857136	264578048	266358688	190592096	48625084	52400244	47150532	7890657	85740232	44961480	2956276	5103095	9704946	9798315	43300736	1	2569907	1
Methapyrilene	37043	7892124	294075936	84062464	385961024	37466140	100712	17850	39079	237004	12063	76754	244572544	190451888	25128	31328	77297	19552
Myo-Inositol, 1,2,3,4,5,6-hexakis-O-(trimethylsilyl)-	3088650240	3006694140	3079635460	1760737540	1541275520	1161715970	2270373890	2672039680	79473448	4386401800	903157180	1208104320	1950872580	2558475780	4568193500	686530050	329826176	715467710
N-(2-Furoyl)glycine	73597	11121	21306	110232	22292	44295	23759	139384	20855	24571	43935	12772	5147	16079	34878	67533	6590	17826
N,N-Dimethylformamide	3091	1545.5	42523	249146	115772	8283	19469	1	1	67259	1	1	9587	19174	24664	9782.5	91297	19565
N-à-(tert-Butoxycarbonyl)-L-Histidine	1	1	1	16946	7549	7871	7653	10302	8496	16127	6951	12548	3099	8959	6198	11302	6835	20220
N-à-(tert-Butoxycarbonyl)-L-Phenylalanine	7716	3898	14920	37025	12593	10394	22264	25719	6890	9390	5329	34489	33440	9879	17273	9899	12492	11188
N-Acetylaspartylglutamic acid	1	1	1	8128.5	16257	16992	1	1	45446	1	1	1	5338345	37259	10195	28779	141933	14389.5
N-Acetyl-D-glucosamine	10824	268456928	20543	8609	24287	15150	2825	92938	28060	4283238	25466908	94863296	33936616	57243788	11134404	79838	57165388	106359
N-Acetyl-L-alanine	11781	6592	3296	12417	12964	10565	6170	11254	9363	8149	2709	5418	12824	10836	10637	18472	8044	18670
Nialamide	18062	25155	12396	8352	31540	12646	5853	18841	14385	1558048	42199	3729	6921	17906	13842	9701	4850.5	11350
Nicotinic acid mononucleotide	1	1	10028	1	1	1	1	1	1	7532	3347	1673.5	3609.5	8570	7219	2137.5	8791	4275
O,O-Diethyl thiophosphate	1	1	1	1	1	140117	1	1	700275	854278	369606	200863408	1248949	1565771	5036135	130812280	25599266	54543380
Ribitol, 1,2,3,4,5-pentakis-O-(trimethylsilyl)-	412583328	1	1	1	1	1	3070603	1.5353e+06	31622148	1	1	1	1	1	1	1	1	1
Salicylic acid	11845	4118	8236	6444	7460.5	14921	15694	7148	3574	35635	5424	19021	11490	8274	9821	5977	14013	13150
Sphingosine 1-phosphate	146491	3889	21577	3052	8993	7446	7431	9278	11603	5747	12615	8286	8330	6435	11284	21845	18334	39277
Stearamide	23403	20790	14152	13214	84247	9151	3045.5	7166	6091	13270	7440	9650	3321.5	57132	6643	27508	10246	31496
Sucrose, octakis(trimethylsilyl) ether	399485120	45178868	107661368	294613792	191621200	41165808	271375232	157725728	198319104	1	1	1	1	1	170885	1	1	1
trans-Aconitic acid	24661	23329	10796	47073	110662	35877	12659	17931	13687	31656	128017	43785	11039	17233	97588	32585	29153	18392
Trimethylsilyl-D-(+)-trehalose	1	1	1	17547.5	35095	49294	81946128	2422.5	4845	6645	13290	37441	11688	5844	2180664	1	1	1
Undecylbenzenesulfonic acid	18536	1	1	1	1	1	15578	1	1	12795	5096.5	10193	2323	18315	7328	6828	7446	3414
Xylitol	1048982	34349	50326	8021	1	1	1	1	9624	1	1	13771	1	1	31044	10594	24669	22527
S - growth in the presence of sucrose
K - growth in the presence of xylose

## Sheet: Table S4
Table S4. Compounds detected in biomass samples that were found in Pectobacterium betavasculorum NCPPB 2795 genome database. The analysis was performed with PathwayTools software.
Compound	InChI	InChI-Key	Molecular-Weight
a-D-xylopyranose	InChI=1S/C5H10O5/c6-2-1-10-5(9)4(8)3(2)7/h2-9H,1H2/t2-,3+,4-,5+/m1/s1	InChIKey=SRBFZHDQGSBBOR-LECHCGJUSA-N	150.131 Daltons
(RS)-malate	InChI=1S/C4H6O5/c5-2(4(8)9)1-3(6)7/h2,5H,1H2,(H,6,7)(H,8,9)/p-2		132.073 Daltons
cis-aconitate	InChI=1S/C6H6O6/c7-4(8)1-3(6(11)12)2-5(9)10/h1H,2H2,(H,7,8)(H,9,10)(H,11,12)/p-3/b3-1-	InChIKey=GTZCVFVGUGFEME-IWQZZHSRSA-K	171.086 Daltons
myo-inositol	InChI=1S/C6H12O6/c7-1-2(8)4(10)6(12)5(11)3(1)9/h1-12H/t1-,2-,3-,4+,5-,6-	InChIKey=CDAISMWEOUEBRE-GPIVLXJGSA-N	180.157 Daltons
N-acetyl-D-glucosamine	InChI=1S/C8H15NO6/c1-3(11)9-5-7(13)6(12)4(2-10)15-8(5)14/h4-8,10,12-14H,2H2,1H3,(H,9,11)/t4-,5-,6-,7-,8?/m1/s1	InChIKey=OVRNDRQMDRJTHS-RTRLPJTCSA-N	221.21 Daltons
acrylate	InChI=1S/C3H4O2/c1-2-3(4)5/h2H,1H2,(H,4,5)/p-1	InChIKey=NIXOWILDQLNWCW-UHFFFAOYSA-M	71.055 Daltons
adenosylcobalamin	InChI=1S/C62H90N13O14P.C10H12N5O3.Co/c1-29-20-39-40(21-30(29)2)75(28-70-39)57-52(84)53(41(27-76)87-57)89-90(85,86)88-31(3)26-69-49(83)18-19-59(8)37(22-46(66)80)56-62(11)61(10,25-48(68)82)36(14-17-45(65)79)51(74-62)33(5)55-60(9,24-47(67)81)34(12-15-43(63)77)38(71-55)23-42-58(6,7)35(13-16-44(64)78)50(72-42)32(4)54(59)73-56;1-4-6(16)7(17)10(18-4)15-3-14-5-8(11)12-2-13-9(5)15;/h20-21,23,28,31,34-37,4…	InChIKey=ZIHHMGTYZOSFRC-DOBZORSKSA-L	1579.596 Daltons
arabinose
D-erythrose	InChI=1S/C4H8O4/c5-1-3(7)4(8)2-6/h1,3-4,6-8H,2H2/t3-,4+/m0/s1	InChIKey=YTBSYETUWUMLBZ-IUYQGCFVSA-N	120.105 Daltons
D-fructose	InChI=1S/C6H12O6/c7-1-3(9)5(11)6(12)4(10)2-8/h3,5-9,11-12H,1-2H2/t3-,5-,6-/m1/s1	InChIKey=BJHIKXHVCXFQLS-UYFOZJQFSA-N	180.157 Daltons
D-galactopyranose	InChI=1S/C6H12O6/c7-1-2-3(8)4(9)5(10)6(11)12-2/h2-11H,1H2/t2-,3+,4+,5-,6?/m1/s1	InChIKey=WQZGKKKJIJFFOK-SVZMEOIVSA-N	180.157 Daltons
D-glucopyranose	InChI=1S/C6H12O6/c7-1-2-3(8)4(9)5(10)6(11)12-2/h2-11H,1H2/t2-,3-,4+,5-,6?/m1/s1	InChIKey=WQZGKKKJIJFFOK-GASJEMHNSA-N	180.157 Daltons
D-mannopyranose	InChI=1S/C6H12O6/c7-1-2-3(8)4(9)5(10)6(11)12-2/h2-11H,1H2/t2-,3-,4+,5+,6?/m1/s1	InChIKey=WQZGKKKJIJFFOK-QTVWNMPRSA-N	180.157 Daltons
D-mannose	InChI=1S/C6H12O6/c7-1-3(9)5(11)6(12)4(10)2-8/h1,3-6,8-12H,2H2/t3-,4-,5-,6-/m1/s1	InChIKey=GZCGUPFRVQAUEE-KVTDHHQDSA-N	180.157 Daltons
D-ribofuranose	InChI=1S/C5H10O5/c6-1-2-3(7)4(8)5(9)10-2/h2-9H,1H2/t2-,3-,4-,5?/m1/s1	InChIKey=HMFHBZSHGGEWLO-SOOFDHNKSA-N	150.131 Daltons
D-ribose	InChI=1S/C5H10O5/c6-1-3(8)5(10)4(9)2-7/h1,3-5,7-10H,2H2/t3-,4+,5-/m0/s1	InChIKey=PYMYPHUHKUWMLA-LMVFSUKVSA-N	150.131 Daltons
dimethyl sulfoxide	InChI=1S/C2H6OS/c1-4(2)3/h1-2H3	InChIKey=IAZDPXIOMUYVGZ-UHFFFAOYSA-N	78.129 Daltons
erythritol	InChI=1S/C4H10O4/c5-1-3(7)4(8)2-6/h3-8H,1-2H2/t3-,4+	InChIKey=UNXHWFMMPAWVPI-ZXZARUISSA-N	122.121 Daltons
glycerol	InChI=1S/C3H8O3/c4-1-3(6)2-5/h3-6H,1-2H2	InChIKey=PEDCQBHIVMGVHV-UHFFFAOYSA-N	92.094 Daltons
L-lysine	InChI=1S/C6H14N2O2/c7-4-2-1-3-5(8)6(9)10/h5H,1-4,7-8H2,(H,9,10)/p+1/t5-/m0/s1	InChIKey=KDXKERNSBIXSRK-YFKPBYRVSA-O	147.197 Daltons
L-quinate	InChI=1S/C7H12O6/c8-3-1-7(13,6(11)12)2-4(9)5(3)10/h3-5,8-10,13H,1-2H2,(H,11,12)/p-1/t3-,4-,5-,7+/m1/s1	InChIKey=AAWZDTNXLSGCEK-WYWMIBKRSA-M	191.16 Daltons
L-serine	InChI=1S/C3H7NO3/c4-2(1-5)3(6)7/h2,5H,1,4H2,(H,6,7)/t2-/m0/s1	InChIKey=MTCFGRXMJLQNBG-REOHCLBHSA-N	105.093 Daltons
pentadecanoate	InChI=1S/C15H30O2/c1-2-3-4-5-6-7-8-9-10-11-12-13-14-15(16)17/h2-14H2,1H3,(H,16,17)/p-1	InChIKey=WQEPLUUGTLDZJY-UHFFFAOYSA-M	241.393 Daltons
sucrose	InChI=1S/C12H22O11/c13-1-4-6(16)8(18)9(19)11(21-4)23-12(3-15)10(20)7(17)5(2-14)22-12/h4-11,13-20H,1-3H2/t4-,5-,6-,7-,8+,9-,10+,11-,12+/m1/s1	InChIKey=CZMRCDWAGMRECN-UGDNZRGBSA-N	342.299 Daltons
tagatose

## Sheet: Table S5
Table S5. Compounds detected in media samples that were found in Pectobacterium betavasculorum NCPPB 2795 genome database. The analysis was performed with PathwayTools software.
Compound	InChI	InChI-Key	Molecular-Weight
a,a-trehalose	InChI=1S/C12H22O11/c13-1-3-5(15)7(17)9(19)11(21-3)23-12-10(20)8(18)6(16)4(2-14)22-12/h3-20H,1-2H2/t3-,4-,5-,6-,7+,8+,9-,10-,11-,12-/m1/s1	InChIKey=HDTRYLNUVZCQOY-LIZSDCNHSA-N	342.299 Daltons
a-D-xylopyranose	InChI=1S/C5H10O5/c6-2-1-10-5(9)4(8)3(2)7/h2-9H,1H2/t2-,3+,4-,5+/m1/s1	InChIKey=SRBFZHDQGSBBOR-LECHCGJUSA-N	150.131 Daltons
b-nicotinate D-ribonucleotide	InChI=1S/C11H14NO9P/c13-8-7(5-20-22(17,18)19)21-10(9(8)14)12-3-1-2-6(4-12)11(15)16/h1-4,7-10,13-14H,5H2,(H2-,15,16,17,18,19)/p-2/t7-,8-,9-,10-/m1/s1	InChIKey=JOUIQRNQJGXQDC-ZYUZMQFOSA-L	333.191 Daltons
(RS)-malate	InChI=1S/C4H6O5/c5-2(4(8)9)1-3(6)7/h2,5H,1H2,(H,6,7)(H,8,9)/p-2		132.073 Daltons
(indol-3-yl)ethanol	InChI=1S/C10H11NO/c12-6-5-8-7-11-10-4-2-1-3-9(8)10/h1-4,7,11-12H,5-6H2	InChIKey=MBBOMCVGYCRMEA-UHFFFAOYSA-N	161.203 Daltons
(indol-3-yl)pyruvate	InChI=1S/C11H9NO3/c13-10(11(14)15)5-7-6-12-9-4-2-1-3-8(7)9/h1-4,6,12H,5H2,(H,14,15)/p-1	InChIKey=RSTKLPZEZYGQPY-UHFFFAOYSA-M	202.189 Daltons
cis-aconitate	InChI=1S/C6H6O6/c7-4(8)1-3(6(11)12)2-5(9)10/h1H,2H2,(H,7,8)(H,9,10)(H,11,12)/p-3/b3-1-	InChIKey=GTZCVFVGUGFEME-IWQZZHSRSA-K	171.086 Daltons
myo-inositol	InChI=1S/C6H12O6/c7-1-2(8)4(10)6(12)5(11)3(1)9/h1-12H/t1-,2-,3-,4+,5-,6-	InChIKey=CDAISMWEOUEBRE-GPIVLXJGSA-N	180.157 Daltons
N-acetyl-D-glucosamine	InChI=1S/C8H15NO6/c1-3(11)9-5-7(13)6(12)4(2-10)15-8(5)14/h4-8,10,12-14H,2H2,1H3,(H,9,11)/t4-,5-,6-,7-,8?/m1/s1	InChIKey=OVRNDRQMDRJTHS-RTRLPJTCSA-N	221.21 Daltons
a phosphatidylcholine
adenosine	InChI=1S/C10H13N5O4/c11-8-5-9(13-2-12-8)15(3-14-5)10-7(18)6(17)4(1-16)19-10/h2-4,6-7,10,16-18H,1H2,(H2,11,12,13)/t4-,6-,7-,10-/m1/s1	InChIKey=OIRDTQYFTABQOQ-KQYNXXCUSA-N	267.244 Daltons
adenosine 2’,3’-cyclic monophosphate	InChI=1S/C10H12N5O6P/c11-8-5-9(13-2-12-8)15(3-14-5)10-7-6(4(1-16)19-10)20-22(17,18)21-7/h2-4,6-7,10,16H,1H2,(H,17,18)(H2,11,12,13)/p-1/t4-,6-,7-,10-/m1/s1	InChIKey=KMYWVDDIPVNLME-KQYNXXCUSA-M	328.201 Daltons
adipate	InChI=1S/C6H10O4/c7-5(8)3-1-2-4-6(9)10/h1-4H2,(H,7,8)(H,9,10)/p-2	InChIKey=WNLRTRBMVRJNCN-UHFFFAOYSA-L	144.127 Daltons
allose
arabinose
D-fructose	InChI=1S/C6H12O6/c7-1-3(9)5(11)6(12)4(10)2-8/h3,5-9,11-12H,1-2H2/t3-,5-,6-/m1/s1	InChIKey=BJHIKXHVCXFQLS-UYFOZJQFSA-N	180.157 Daltons
D-galactopyranose	InChI=1S/C6H12O6/c7-1-2-3(8)4(9)5(10)6(11)12-2/h2-11H,1H2/t2-,3+,4+,5-,6?/m1/s1	InChIKey=WQZGKKKJIJFFOK-SVZMEOIVSA-N	180.157 Daltons
D-glucopyranose	InChI=1S/C6H12O6/c7-1-2-3(8)4(9)5(10)6(11)12-2/h2-11H,1H2/t2-,3-,4+,5-,6?/m1/s1	InChIKey=WQZGKKKJIJFFOK-GASJEMHNSA-N	180.157 Daltons
D-mannopyranose	InChI=1S/C6H12O6/c7-1-2-3(8)4(9)5(10)6(11)12-2/h2-11H,1H2/t2-,3-,4+,5+,6?/m1/s1	InChIKey=WQZGKKKJIJFFOK-QTVWNMPRSA-N	180.157 Daltons
D-mannose	InChI=1S/C6H12O6/c7-1-3(9)5(11)6(12)4(10)2-8/h1,3-6,8-12H,2H2/t3-,4-,5-,6-/m1/s1	InChIKey=GZCGUPFRVQAUEE-KVTDHHQDSA-N	180.157 Daltons
D-ribofuranose	InChI=1S/C5H10O5/c6-1-2-3(7)4(8)5(9)10-2/h2-9H,1H2/t2-,3-,4-,5?/m1/s1	InChIKey=HMFHBZSHGGEWLO-SOOFDHNKSA-N	150.131 Daltons
glycerol	InChI=1S/C3H8O3/c4-1-3(6)2-5/h3-6H,1-2H2	InChIKey=PEDCQBHIVMGVHV-UHFFFAOYSA-N	92.094 Daltons
guanine	InChI=1S/C5H5N5O/c6-5-9-3-2(4(11)10-5)7-1-8-3/h1H,(H4,6,7,8,9,10,11)	InChIKey=UYTPUPDQBNUYGX-UHFFFAOYSA-N	151.127 Daltons
hypoxanthine	InChI=1S/C5H4N4O/c10-5-3-4(7-1-6-3)8-2-9-5/h1-2H,(H2,6,7,8,9,10)	InChIKey=FDGQSTZJBFJUBT-UHFFFAOYSA-N	136.113 Daltons
isocyanurate	InChI=1S/C3H3N3O3/c7-1-4-2(8)6-3(9)5-1/h(H3,4,5,6,7,8,9)	InChIKey=ZFSLODLOARCGLH-UHFFFAOYSA-N	129.075 Daltons
L-arginine	InChI=1S/C6H14N4O2/c7-4(5(11)12)2-1-3-10-6(8)9/h4H,1-3,7H2,(H,11,12)(H4,8,9,10)/p+1/t4-/m0/s1	InChIKey=ODKSFYDXXFIFQN-BYPYZUCNSA-O	175.21 Daltons
L-lysine	InChI=1S/C6H14N2O2/c7-4-2-1-3-5(8)6(9)10/h5H,1-4,7-8H2,(H,9,10)/p+1/t5-/m0/s1	InChIKey=KDXKERNSBIXSRK-YFKPBYRVSA-O	147.197 Daltons
lactose	InChI=1S/C12H22O11/c13-1-3-5(15)6(16)9(19)12(22-3)23-10-4(2-14)21-11(20)8(18)7(10)17/h3-20H,1-2H2/t3-,4-,5+,6+,7-,8-,9-,10-,11?,12+/m1/s1	InChIKey=GUBGYTABKSRVRQ-QKKXKWKRSA-N	342.299 Daltons
maltose	InChI=1S/C12H22O11/c13-1-3-5(15)6(16)9(19)12(22-3)23-10-4(2-14)21-11(20)8(18)7(10)17/h3-20H,1-2H2/t3-,4-,5-,6+,7-,8-,9-,10-,11?,12-/m1/s1	InChIKey=GUBGYTABKSRVRQ-PICCSMPSSA-N	342.299 Daltons
sorbose
sucrose	InChI=1S/C12H22O11/c13-1-4-6(16)8(18)9(19)11(21-4)23-12(3-15)10(20)7(17)5(2-14)22-12/h4-11,13-20H,1-3H2/t4-,5-,6-,7-,8+,9-,10+,11-,12+/m1/s1	InChIKey=CZMRCDWAGMRECN-UGDNZRGBSA-N	342.299 Daltons
tagatose
urocanate	InChI=1S/C6H6N2O2/c9-6(10)2-1-5-3-7-4-8-5/h1-4H,(H,7,8)(H,9,10)/p-1/b2-1+	InChIKey=LOIYMIARKYCTBW-OWOJBTEDSA-M	137.118 Daltons

## Sheet: Table S6
Table S6. Pathways found in P. betavasculorum NCPPB 2795 genome database after analysis against compounds detected in biomass samples supplemented with sucrose. The analysis was performed with PathwayTools software.
Pathway	DPPS	Genes	Reaction-List
sucrose degradation I (sucrose phosphotransferase)	118.786	KP22_RS13795, mak, KP22_RS13800	an [HPr protein]-Np-phospho-L-histidine + sucrose[out] -> an [HPr]-L-histidine + sucrose 6G-phosphate
			[in]
			b-D-fructofuranose + ATP -> b-D-fructofuranose 6-phosphate + ADP + H+ sucrose 6G-phosphate + H2O -> b-D-glucose 6-phosphate + b-D-fructofuranose
D-mannose degradation I	133.678	manA, manX	an [HPr protein]-Np-phospho-L-histidine + D-mannopyranose[out] -> D-mannopyranose 6-phosphate[in] + an [HPr]-L-histidine
			D-mannopyranose 6-phosphate -> b-D-fructofuranose 6-phosphate
D-mannose degradation II	133.678	manA, mak	D-mannopyranose + ATP -> D-mannopyranose 6-phosphate + ADP + H+ D-mannopyranose 6-phosphate -> b-D-fructofuranose 6-phosphate
myo-inositol biosynthesis	14.1087	suhB	1D-myo-inositol 3-monophosphate + H2O -> myo-inositol + phosphate D-glucopyranose 6-phosphate -> 1D-myo-inositol 3-monophosphate
acrylonitrile degradation I	168.65	nthA, nthB, KP22_RS20750	acrylamide + H2O -> ammonium + acrylate acrylamide <- acrylonitrile + H2O
peptidoglycan recycling I	25.0583	murQ, anmK, nagZ, KP22_RS03030, amiC, ampD, amiB, nagA, glmM, glmU, mepS, mpl, murA, murB, mltG, mltC, mltB, mltF	a mature peptidoglycan (meso-DAP containing) -> GlcNAc-1,6-anhMurNAc-L-Ala-g-D-Glu-meso
			-DAP-D-Ala + a mature peptidoglycan(n-1) (meso-DAP containing)
			GlcNAc-1,6-anhMurNAc-L-Ala-g-D-Glu-meso-DAP-D-Ala[out] + H+[out] <--> GlcNAc-1,6-anhMurNAc-L-Ala-g
			-D-Glu-meso-DAP-D-Ala[in] + H+[in]
			UDP-N-acetyl-a-D-muramate + NADP+ <- UDP-N-acetyl-a-D-glucosamine-enolpyruvate + NADPH + H+ UDP-N-acetyl-a-D-glucosamine + phosphoenolpyruvate -> UDP-N-acetyl-a
			-D-glucosamine-enolpyruvate + phosphate
			UDP-N-acetyl-a-D-muramate + L-alanyl-g-D-glutamyl-meso-diaminopimelate + ATP -> UDP-MurNAc-L-Ala-g-D-Glu-meso-DAP + ADP + phosphate + H+
			L-alanyl-g-D-glutamyl-meso-2,6-diaminopimeloyl-D-alanine + H2O -> L-alanyl-g-D-glutamyl-meso
			-diaminopimelate + D-alanine
			UTP + N-acetyl-a-D-glucosamine 1-phosphate + H+ -> UDP-N-acetyl-a-D-glucosamine + diphosphate acetyl-CoA + a-D-glucosamine 1-phosphate -> N-acetyl-a-D-glucosamine 1-phosphate + coenzyme A + H+
			D-glucosamine 6-phosphate <--> a-D-glucosamine 1-phosphate
			N-acetyl-D-glucosamine 6-phosphate + H2O -> D-glucosamine 6-phosphate + acetate GlcNAc-1,6-anhMurNAc-L-Ala-g-D-Glu-meso-DAP-D-Ala + H2O -> N-acetyl-b
			-D-glucosamine-1,6-anhydro-N-acetyl-b-D-muramate + L-alanyl-g-D-glutamyl-meso
			-2,6-diaminopimeloyl-D-alanine
			N-acetyl-b-D-glucosamine-1,6-anhydro-N-acetyl-b-D-muramate + H2O -> N-acetyl-D-glucosamine + 1,6-anhydro-N-acetyl-b-D-muramate
			1,6-anhydro-N-acetyl-b-D-muramate + ATP + H2O -> N-acetyl-D-muramate 6-phosphate + ADP + H+
			N-acetyl-D-muramate 6-phosphate + H2O <--> N-acetyl-D-glucosamine 6-phosphate + (R)-lactate
glycogen degradation II	273.01	malP, glgP, pgm, deoB, malQ	D-glucopyranose + ATP -> D-glucopyranose 6-phosphate + ADP + H+ an a-limit dextrin -> a debranched a-limit dextrin
			a-D-glucopyranose 1-phosphate <--> D-glucopyranose 6-phosphate a debranched a-limit dextrin + n H2O -> n D-glucopyranose
			a debranched a-limit dextrin + n phosphate -> n a-D-glucopyranose 1-phosphate
			a glycogen + n phosphate -> an a-limit dextrin + n a-D-glucopyranose 1-phosphate
tRNA charging	32.3937	argS, cysS, glnS, gltX, ileS, leuS, KP22_RS13985, alaS, asnS, aspS, tyrS, trpS, thrS, serS, proS, hofC, pheT, pheS, lysS, hisS, glyS, glyQ, metG, KP22_RS12145, KP22_RS12300, KP22_RS18720, KP22_RS16575, KP22_RS16570, KP22_RS16565, KP22_RS07675, KP22_RS01005, KP22_RS01010, KP22_RS00995, KP22_RS21105, KP22_RS09715, KP22_RS21060, KP22_RS09375, KP22_RS09595, KP22_RS18710, KP22_RS01015, KP22_RS09370, K…	initiator tRNAMet + L-methionine + ATP -> an L-methionyl-[initiator tRNAMet] + AMP + diphosphate a tRNAGly + glycine + ATP -> a glycyl-[tRNAGly] + AMP + diphosphate
			a tRNAHis + L-histidine + ATP -> an L-histidyl-[tRNAHis] + AMP + diphosphate L-lysine + a tRNALys + ATP -> an L-lysyl-[tRNALys] + AMP + diphosphate
			elongator tRNAMet + L-methionine + ATP -> an L-methionyl-[elongator tRNAMet] + AMP + diphosphate a tRNAPhe + L-phenylalanine + ATP -> an L-phenylalanyl-[tRNAPhe] + AMP + diphosphate
			a tRNAPro + L-proline + ATP -> an L-prolyl-[tRNAPro] + AMP + diphosphate a tRNAser + L-serine + ATP -> an L-seryl-[tRNAser] + AMP + diphosphate
			a tRNAThr + L-threonine + ATP -> an L-threonyl-[tRNAThr] + AMP + diphosphate
			L-tryptophan + a tRNATrp + ATP -> AMP + an L-tryptophanyl-[tRNATrp] + diphosphate a tRNATyr + L-tyrosine + ATP -> an L-tyrosyl-[tRNATyr] + AMP + diphosphate
			tRNAasp + L-aspartate + ATP -> an L-aspartyl-[tRNAasp] + AMP + diphosphate tRNAAsn + L-asparagine + ATP -> an L-asparaginyl-[tRNAAsn] + AMP + diphosphate a tRNAAla + L-alanine + ATP -> an L-alanyl-[tRNAAla] + AMP + diphosphate
			a tRNAVal + L-valine + ATP -> an L-valyl-[tRNAVal] + AMP + diphosphate
			a tRNALeu + L-leucine + ATP -> an L-leucyl-[tRNALeu] + AMP + diphosphate
			a tRNAIle + L-isoleucine + ATP -> an L-isoleucyl-[tRNAIle] + AMP + diphosphate a tRNAglu + L-glutamate + ATP -> an L-glutamyl-[tRNAGlu] + AMP + diphosphate
			a tRNAGln + L-glutamine + ATP -> an L-glutaminyl-[tRNAGln] + AMP + diphosphate a tRNACys + L-cysteine + ATP -> an L-cysteinyl-[tRNACys] + AMP + diphosphate
			a tRNAArg + L-arginine + ATP -> an L-arginyl-[tRNAArg] + AMP + diphosphate
lactose degradation III	334.368	KP22_RS16775	lactose + H2O -> D-glucopyranose
sucrose degradation III (sucrose invertase)	334.368	mak, pgi, kduI, KP22_RS13795	sucrose + H2O -> b-D-fructofuranose + D-glucopyranose
			D-glucopyranose + ATP -> D-glucopyranose 6-phosphate + ADP + H+
			a-D-glucose 6-phosphate <--> b-D-fructofuranose 6-phosphate
			b-D-fructofuranose + ATP -> b-D-fructofuranose 6-phosphate + ADP + H+
glycogen degradation I	354.65	malQ, glgX, KP22_RS06865, KP22_RS14475, pgm, deoB, malP, glgP	a debranched a-limit dextrin + n phosphate -> maltotriose + n a-D-glucopyranose 1-phosphate maltotetraose + phosphate -> maltotriose + a-D-glucopyranose 1-phosphate
			D-glucopyranose + ATP -> D-glucopyranose 6-phosphate + ADP + H+
			a-D-glucopyranose 1-phosphate <--> D-glucopyranose 6-phosphate maltotriose + H2O -> maltose + D-glucopyranose
			an a-limit dextrin + H2O -> maltotetraose + a debranched a-limit dextrin
			a glycogen + n phosphate -> an a-limit dextrin + n a-D-glucopyranose 1-phosphate maltotetraose + D-glucopyranose <--> maltotriose + maltose
glucose and glucose-1-phosphate degradation	448.601	yihX, pgm, deoB	D-glucopyranose[out] + a ubiquinone[inner membrane] -> D-glucono-1,5-lactone[out] + a ubiquinol[inner
			membrane]
			D-glucopyranose + ATP -> D-glucopyranose 6-phosphate + ADP + H+
			a-D-glucopyranose 1-phosphate <--> D-glucopyranose 6-phosphate D-glucono-1,5-lactone + H2O -> D-gluconate + H+
			a-D-glucopyranose 1-phosphate + H2O -> D-glucopyranose + phosphate
L-lysine biosynthesis I	46.3131	dapF, lysA, dapE, dapD, dapA, KP22_RS08070, KP22_RS11220, KP22_RS20145, KP22_RS12435, asd,	(S)-2,3,4,5-tetrahydrodipicolinate + NAD(P)+ + H2O <- (2S,4S)-4-hydroxy-2,3,4,5-tetrahydrodipicolinate + NAD(P)H + H+
		thrA, lysC, KP22_RS19165, dapB	L-aspartate + ATP -> L-aspartyl-4-phosphate + ADP
			L-aspartate 4-semialdehyde + NADP+ + phosphate <--> L-aspartyl-4-phosphate + NADPH + H+ pyruvate + L-aspartate 4-semialdehyde -> (2S,4S)-4-hydroxy-2,3,4,5-tetrahydrodipicolinate + H2O + H+ (S)-2,3,4,5-tetrahydrodipicolinate + succinyl-CoA + H2O -> N-succinyl-2-amino-6-ketopimelate + coenzyme A
			N-succinyl-L,L-2,6-diaminopimelate + 2-oxoglutarate <--> N-succinyl-2-amino-6-ketopimelate + L-glutamate
			N-succinyl-L,L-2,6-diaminopimelate + H2O -> L,L-diaminopimelate + succinate
			meso-diaminopimelate + H+ -> L-lysine + CO2 L,L-diaminopimelate -> meso-diaminopimelate
trehalose degradation I (low osmolarity)	472.867	treC	D-glucopyranose + ATP -> D-glucopyranose 6-phosphate + ADP + H+
			a,a-trehalose 6-phosphate + H2O -> D-glucopyranose 6-phosphate + D-glucopyranose
adenosylcobalamin salvage from cobalamin	53.9915	cobO	adenosylcob(III)alamin-[corrinoid adenosyltranferase] -> a [corrinoid adenosyltransferase] + adenosylcobalamin
			2 cob(I)alamin + an [oxidized flavoprotein] + 2 H+ -> a [reduced flavoprotein] + 2 cob(II)alamin
			a [corrinoid adenosyltransferase] + cob(II)alamin -> cob(II)alamin-[corrinoid adenosyltranferase]
			2 cob(II)alamin-[corrinoid adenosyltranferase] + a [reduced flavoprotein] -> 2 cob(I)alamin-[corrinoid adenosyltranferase] + an [oxidized flavoprotein] + 2 H+
			cob(I)alamin-[corrinoid adenosyltranferase] + ATP + H+ -> adenosylcob(III)alamin-[corrinoid adenosyltranferase] + triphosphate
N-acetylglucosamine degradation II	54.132	nagK, nagB, nagA	N-acetylglucosamine degradation I
			N-acetyl-D-glucosamine + ATP -> N-acetyl-D-glucosamine 6-phosphate + ADP + H+
superpathway of glycolysis, pyruvate dehydrogenase, TCA, and glyoxylate bypass	68.4328	aceB, aceA, fumC, fumA, sucD, sucC, sucA, KP22_RS01145, KP22_RS13325, acnA, acnB, mqo, icd, KP22_RS02155, mdh, KP22_RS03655, KP22_RS01890, KP22_RS01165, sdhC, frdA, frdC, frdD, sdhD,	pyruvate + coenzyme A + NAD+ -> acetyl-CoA + CO2 + NADH glycolysis I (from glucose 6-phosphate)
		pykF, pyk, eno, pgk, gapA, tpiA, fbaA, pfkA, KP22_RS04580, pgi, kduI, ppsA, fbp, glpX, gpmA, gpmB, crr	superpathway of glyoxylate bypass and TCA
		, ptsG, aceF
glycine biosynthesis I	9.50729	glyA	L-serine + a tetrahydrofolate <--> glycine + a 5,10-methylenetetrahydrofolate + H2O
superpathway of L-serine and glycine biosynthesis I	9.50729	serC, serA, serB, glyA	glycine biosynthesis I L-serine biosynthesis I
glycolysis I (from glucose 6-phosphate)	92.7369	pykF, pyk, eno, pgk, gapA, tpiA, fbaA, pfkA, KP22_RS04580, pgi, kduI, ppsA, fbp, glpX, gpmA, gpmB, crr, ptsG	an [HPr protein]-Np-phospho-L-histidine + D-glucopyranose[out] -> D-glucopyranose 6-phosphate[in] + an [HPr]-L-histidine
			2-phospho-D-glycerate <--> 3-phospho-D-glycerate
			b-D-fructofuranose 1,6-bisphosphate + H2O -> b-D-fructofuranose 6-phosphate + phosphate pyruvate + ATP + H2O <--> phosphoenolpyruvate + AMP + phosphate + 2 H+
			a-D-glucose 6-phosphate <--> b-D-fructofuranose 6-phosphate
			ATP + b-D-fructofuranose 6-phosphate -> ADP + b-D-fructofuranose 1,6-bisphosphate + H+
			b-D-fructofuranose 1,6-bisphosphate <--> glycerone phosphate + D-glyceraldehyde 3-phosphate D-glyceraldehyde 3-phosphate <--> glycerone phosphate
			D-glyceraldehyde 3-phosphate + NAD+ + phosphate <--> 3-phospho-D-glyceroyl phosphate + NADH + H+
			3-phospho-D-glycerate + ATP <--> 3-phospho-D-glyceroyl phosphate + ADP 2-phospho-D-glycerate <--> 3-phospho-D-glycerate
			2-phospho-D-glycerate <--> phosphoenolpyruvate + H2O pyruvate + ATP <- phosphoenolpyruvate + ADP + H+

## Sheet: Table S7
Table S7. Pathways found in P. betavasculorum NCPPB 2795 genome database after analysis against compounds detected in biomass samples supplemented with xylose. The analysis was performed with PathwayTools software.
Pathway	DPPS	Genes	Reaction-List
N-acetylglucosamine degradation II	2.88111	nagK, nagB, nagA	N-acetylglucosamine degradation I
			N-acetyl-D-glucosamine + ATP -> N-acetyl-D-glucosamine 6-phosphate + ADP + H+
adenosylcobalamin salvage from cobalamin	47.4803	cobO	adenosylcob(III)alamin-[corrinoid adenosyltranferase] -> a [corrinoid adenosyltransferase] + adenosylcobalamin
			2 cob(I)alamin + an [oxidized flavoprotein] + 2 H+ -> a [reduced flavoprotein] + 2 cob(II)alamin
			a [corrinoid adenosyltransferase] + cob(II)alamin -> cob(II)alamin-[corrinoid adenosyltranferase]
			2 cob(II)alamin-[corrinoid adenosyltranferase] + a [reduced flavoprotein] -> 2 cob(I)alamin-[corrinoid adenosyltranferase] + an [oxidized flavoprotein] + 2 H+
			cob(I)alamin-[corrinoid adenosyltranferase] + ATP + H+ -> adenosylcob(III)alamin-[corrinoid adenosyltranferase] + triphosphate
D-xylose degradation I	139.528	xylB, xylA	a-D-xylopyranose <--> a-D-xylulofuranose
			D-xylulose + ATP -> D-xylulose 5-phosphate + ADP + H+
glucose and glucose-1-phosphate degradation	279.563	yihX, pgm, deoB	D-glucopyranose[out] + a ubiquinone[inner membrane] -> D-glucono-1,5-lactone[out] + a ubiquinol[inner
			membrane]
			D-glucopyranose + ATP -> D-glucopyranose 6-phosphate + ADP + H+
			a-D-glucopyranose 1-phosphate <--> D-glucopyranose 6-phosphate D-glucono-1,5-lactone + H2O -> D-gluconate + H+
			a-D-glucopyranose 1-phosphate + H2O -> D-glucopyranose + phosphate
glycogen degradation I	221.014	malQ, glgX, KP22_RS06865, KP22_RS14475, pgm, deoB, malP, glgP	a debranched a-limit dextrin + n phosphate -> maltotriose + n a-D-glucopyranose 1-phosphate maltotetraose + phosphate -> maltotriose + a-D-glucopyranose 1-phosphate
			D-glucopyranose + ATP -> D-glucopyranose 6-phosphate + ADP + H+
			a-D-glucopyranose 1-phosphate <--> D-glucopyranose 6-phosphate maltotriose + H2O -> maltose + D-glucopyranose
			an a-limit dextrin + H2O -> maltotetraose + a debranched a-limit dextrin
			a glycogen + n phosphate -> an a-limit dextrin + n a-D-glucopyranose 1-phosphate maltotetraose + D-glucopyranose <--> maltotriose + maltose
glycogen degradation II	170.137	malP, glgP, pgm, deoB, malQ	D-glucopyranose + ATP -> D-glucopyranose 6-phosphate + ADP + H+ an a-limit dextrin -> a debranched a-limit dextrin
			a-D-glucopyranose 1-phosphate <--> D-glucopyranose 6-phosphate a debranched a-limit dextrin + n H2O -> n D-glucopyranose
			a debranched a-limit dextrin + n phosphate -> n a-D-glucopyranose 1-phosphate
			a glycogen + n phosphate -> an a-limit dextrin + n a-D-glucopyranose 1-phosphate
glycolysis I (from glucose 6-phosphate)	57.7925	pykF, pyk, eno, pgk, gapA, tpiA, fbaA, pfkA, KP22_RS04580, pgi, kduI, ppsA, fbp, glpX, gpmA, gpmB, crr, ptsG	an [HPr protein]-Np-phospho-L-histidine + D-glucopyranose[out] -> D-glucopyranose 6-phosphate[in] + an [HPr]-L-histidine
			2-phospho-D-glycerate <--> 3-phospho-D-glycerate
			b-D-fructofuranose 1,6-bisphosphate + H2O -> b-D-fructofuranose 6-phosphate + phosphate pyruvate + ATP + H2O <--> phosphoenolpyruvate + AMP + phosphate + 2 H+
			a-D-glucose 6-phosphate <--> b-D-fructofuranose 6-phosphate
			ATP + b-D-fructofuranose 6-phosphate -> ADP + b-D-fructofuranose 1,6-bisphosphate + H+
			b-D-fructofuranose 1,6-bisphosphate <--> glycerone phosphate + D-glyceraldehyde 3-phosphate D-glyceraldehyde 3-phosphate <--> glycerone phosphate
			D-glyceraldehyde 3-phosphate + NAD+ + phosphate <--> 3-phospho-D-glyceroyl phosphate + NADH + H+
			3-phospho-D-glycerate + ATP <--> 3-phospho-D-glyceroyl phosphate + ADP 2-phospho-D-glycerate <--> 3-phospho-D-glycerate
			2-phospho-D-glycerate <--> phosphoenolpyruvate + H2O pyruvate + ATP <- phosphoenolpyruvate + ADP + H+
glyoxylate cycle	6.29045	aceB, aceA, KP22_RS01145, KP22_RS13325, acnA, acnB, KP22_RS02155, mdh, KP22_RS03655, KP22_RS01890	(S)-malate + NAD+ <--> oxaloacetate + NADH + H+ citrate <--> cis-aconitate + H2O
			acetyl-CoA + oxaloacetate + H2O -> citrate + coenzyme A + H+
			cis-aconitate + H2O <--> D-threo-isocitrate D-threo-isocitrate -> glyoxylate + succinate
			acetyl-CoA + glyoxylate + H2O -> (S)-malate + coenzyme A + H+
guanine and guanosine salvage II	8.36398	hpt, gpt	guanosine + H2O -> D-ribofuranose + guanine
			GMP + diphosphate <- guanine + 5-phospho-a-D-ribose 1-diphosphate
L-lysine biosynthesis I	29.9899	dapF, lysA, dapE, dapD, dapA, KP22_RS08070, KP22_RS11220, KP22_RS20145, KP22_RS12435, asd,	(S)-2,3,4,5-tetrahydrodipicolinate + NAD(P)+ + H2O <- (2S,4S)-4-hydroxy-2,3,4,5-tetrahydrodipicolinate + NAD(P)H + H+
		thrA, lysC, KP22_RS19165, dapB	L-aspartate + ATP -> L-aspartyl-4-phosphate + ADP
			L-aspartate 4-semialdehyde + NADP+ + phosphate <--> L-aspartyl-4-phosphate + NADPH + H+ pyruvate + L-aspartate 4-semialdehyde -> (2S,4S)-4-hydroxy-2,3,4,5-tetrahydrodipicolinate + H2O + H+ (S)-2,3,4,5-tetrahydrodipicolinate + succinyl-CoA + H2O -> N-succinyl-2-amino-6-ketopimelate + coenzyme A
			N-succinyl-L,L-2,6-diaminopimelate + 2-oxoglutarate <--> N-succinyl-2-amino-6-ketopimelate + L-glutamate
			N-succinyl-L,L-2,6-diaminopimelate + H2O -> L,L-diaminopimelate + succinate
			meso-diaminopimelate + H+ -> L-lysine + CO2 L,L-diaminopimelate -> meso-diaminopimelate
lactose degradation III	208.374	KP22_RS16775	lactose + H2O -> D-glucopyranose
ribose phosphorylation	8.36398	rbsK, rbsK, rbsD	b-D-ribopyranose -> b-D-ribofuranose
			D-ribofuranose + ATP -> D-ribofuranose 5-phosphate + ADP + H+
sucrose degradation I (sucrose phosphotransferase)	5.25974	KP22_RS13795, mak, KP22_RS13800	an [HPr protein]-Np-phospho-L-histidine + sucrose[out] -> an [HPr]-L-histidine + sucrose 6G-phosphate
			[in]
			b-D-fructofuranose + ATP -> b-D-fructofuranose 6-phosphate + ADP + H+ sucrose 6G-phosphate + H2O -> b-D-glucose 6-phosphate + b-D-fructofuranose
sucrose degradation III (sucrose invertase)	208.374	mak, pgi, kduI, KP22_RS13795	sucrose + H2O -> b-D-fructofuranose + D-glucopyranose
			D-glucopyranose + ATP -> D-glucopyranose 6-phosphate + ADP + H+
			a-D-glucose 6-phosphate <--> b-D-fructofuranose 6-phosphate
			b-D-fructofuranose + ATP -> b-D-fructofuranose 6-phosphate + ADP + H+
superpathway of glucose and xylose degradation	47.8576	xylB, xylA, gapA, pgk, gpmA, gpmB, eno, pykF, pyk, KP22_RS05905, dld, tal, tkt, KP22_RS06150, rpe, rpiA, pgl, gndA, zwf	pentose phosphate pathway
			D-erythrose 4-phosphate + D-xylulose 5-phosphate <--> b-D-fructofuranose 6-phosphate +
			D-glyceraldehyde 3-phosphate
			(R)-lactate + NAD+ <--> pyruvate + NADH + H+ (S)-lactate + NAD+ <--> pyruvate + NADH + H+
			pyruvate + ATP <- phosphoenolpyruvate + ADP + H+
			2-phospho-D-glycerate <--> phosphoenolpyruvate + H2O 2-phospho-D-glycerate <--> 3-phospho-D-glycerate
			3-phospho-D-glycerate + ATP <--> 3-phospho-D-glyceroyl phosphate + ADP
			D-glyceraldehyde 3-phosphate + NAD+ + phosphate <--> 3-phospho-D-glyceroyl phosphate + NADH + H+
			D-xylose degradation I
superpathway of glycolysis, pyruvate dehydrogenase, TCA, and glyoxylate bypass	43.8873	aceB, aceA, fumC, fumA, sucD, sucC, sucA, KP22_RS01145, KP22_RS13325, acnA, acnB, mqo, icd, KP22_RS02155, mdh, KP22_RS03655, KP22_RS01890, KP22_RS01165, sdhC, frdA, frdC, frdD, sdhD,	pyruvate + coenzyme A + NAD+ -> acetyl-CoA + CO2 + NADH glycolysis I (from glucose 6-phosphate)
		pykF, pyk, eno, pgk, gapA, tpiA, fbaA, pfkA, KP22_RS04580, pgi, kduI, ppsA, fbp, glpX, gpmA, gpmB, crr	superpathway of glyoxylate bypass and TCA
		, ptsG, aceF
superpathway of glyoxylate bypass and TCA	4.44802	aceB, aceA, fumC, fumA, sucD, sucC, sucA, KP22_RS01145, KP22_RS13325, acnA, acnB, mqo, icd, KP22_RS02155, mdh, KP22_RS03655, KP22_RS01890, KP22_RS01165, sdhC, frdA, frdC, frdD, sdhD	TCA cycle I (prokaryotic) glyoxylate cycle
TCA cycle I (prokaryotic)	4.87256	fumC, fumA, sucD, sucC, sucA, KP22_RS01145, KP22_RS13325, acnA, acnB, mqo, icd, KP22_RS02155, mdh, KP22_RS03655, KP22_RS01890, KP22_RS01165, sdhC, frdA, frdC, frdD, sdhD	succinate[in] + an electron-transfer quinone[membrane] <--> fumarate[in] + an electron-transfer quinol
			[membrane]
			(S)-malate + NAD+ <--> oxaloacetate + NADH + H+
			D-threo-isocitrate + NADP+ <--> 2-oxoglutarate + CO2 + NADPH
			(S)-malate[in] + an electron-transfer quinone[membrane] <--> oxaloacetate[in] + an electron-transfer quinol
			[membrane]
			citrate <--> cis-aconitate + H2O
			acetyl-CoA + oxaloacetate + H2O -> citrate + coenzyme A + H+
			cis-aconitate + H2O <--> D-threo-isocitrate
			2-oxoglutarate + coenzyme A + NAD+ -> succinyl-CoA + CO2 + NADH succinate + coenzyme A + ATP <--> succinyl-CoA + ADP + phosphate (S)-malate <--> fumarate + H2O
trehalose degradation I (low osmolarity)	294.685	treC	D-glucopyranose + ATP -> D-glucopyranose 6-phosphate + ADP + H+
			a,a-trehalose 6-phosphate + H2O -> D-glucopyranose 6-phosphate + D-glucopyranose
tRNA charging	19.633	argS, cysS, glnS, gltX, ileS, leuS, KP22_RS13985, alaS, asnS, aspS, tyrS, trpS, thrS, serS, proS, hofC, pheT, pheS, lysS, hisS, glyS, glyQ, metG, KP22_RS16565, KP22_RS12145, KP22_RS12300, KP22_RS18720, KP22_RS16575, KP22_RS16570, KP22_RS07675, KP22_RS01005, KP22_RS01010, KP22_RS00995, KP22_RS21105, KP22_RS09715, KP22_RS21060, KP22_RS09365, KP22_RS09375, KP22_RS09595, KP22_RS18710, KP22_RS01015, K…	initiator tRNAMet + L-methionine + ATP -> an L-methionyl-[initiator tRNAMet] + AMP + diphosphate a tRNAGly + glycine + ATP -> a glycyl-[tRNAGly] + AMP + diphosphate
			a tRNAHis + L-histidine + ATP -> an L-histidyl-[tRNAHis] + AMP + diphosphate L-lysine + a tRNALys + ATP -> an L-lysyl-[tRNALys] + AMP + diphosphate
			elongator tRNAMet + L-methionine + ATP -> an L-methionyl-[elongator tRNAMet] + AMP + diphosphate a tRNAPhe + L-phenylalanine + ATP -> an L-phenylalanyl-[tRNAPhe] + AMP + diphosphate
			a tRNAPro + L-proline + ATP -> an L-prolyl-[tRNAPro] + AMP + diphosphate a tRNAser + L-serine + ATP -> an L-seryl-[tRNAser] + AMP + diphosphate
			a tRNAThr + L-threonine + ATP -> an L-threonyl-[tRNAThr] + AMP + diphosphate
			L-tryptophan + a tRNATrp + ATP -> AMP + an L-tryptophanyl-[tRNATrp] + diphosphate a tRNATyr + L-tyrosine + ATP -> an L-tyrosyl-[tRNATyr] + AMP + diphosphate
			tRNAasp + L-aspartate + ATP -> an L-aspartyl-[tRNAasp] + AMP + diphosphate tRNAAsn + L-asparagine + ATP -> an L-asparaginyl-[tRNAAsn] + AMP + diphosphate a tRNAAla + L-alanine + ATP -> an L-alanyl-[tRNAAla] + AMP + diphosphate
			a tRNAVal + L-valine + ATP -> an L-valyl-[tRNAVal] + AMP + diphosphate
			a tRNALeu + L-leucine + ATP -> an L-leucyl-[tRNALeu] + AMP + diphosphate
			a tRNAIle + L-isoleucine + ATP -> an L-isoleucyl-[tRNAIle] + AMP + diphosphate a tRNAglu + L-glutamate + ATP -> an L-glutamyl-[tRNAGlu] + AMP + diphosphate
			a tRNAGln + L-glutamine + ATP -> an L-glutaminyl-[tRNAGln] + AMP + diphosphate a tRNACys + L-cysteine + ATP -> an L-cysteinyl-[tRNACys] + AMP + diphosphate
			a tRNAArg + L-arginine + ATP -> an L-arginyl-[tRNAArg] + AMP + diphosphate

## Sheet: Table S8
Table S8. Pathways found in P. betavasculorum NCPPB 2795 genome database after analysis against compounds detected in media samples supplemented with sucrose. The analysis was performed with PathwayTools software.
Pathway	Genes	DPPS	Reaction-List
N-acetylglucosamine degradation II	nagK, nagB, nagA	75.85	N-acetylglucosamine degradation I
			N-acetyl-D-glucosamine + ATP -> N-acetyl-D-glucosamine 6-phosphate + ADP + H+
S-methyl-5’-thioadenosine degradation III	deoD, yfiH, ppnP	213.249	S-methyl-5’-thioinosine + phosphate -> hypoxanthine + S-methyl-5-thio-a-D-ribose 1-phosphate
			S-methyl-5’-thioadenosine + H+ + H2O -> S-methyl-5’-thioinosine + ammonium
adenine and adenosine salvage III	ppnP, deoD, add, yfiH, hpt, gpt	307.421	IMP + diphosphate <- hypoxanthine + 5-phospho-a-D-ribose 1-diphosphate adenosine + H2O + H+ -> inosine + ammonium
			adenosine + phosphate <--> adenine + a-D-ribose-1-phosphate
			inosine + phosphate <--> hypoxanthine + a-D-ribose-1-phosphate
adenosine nucleotides degradation II	ppnP, deoD, add, yfiH, xdhC, xdhB, xdhA, KP22_RS10275, yrfG, ushA	274.965	AMP + H2O -> adenosine + phosphate
			hypoxanthine + NAD+ + H2O -> xanthine + NADH + H+ xanthine + NAD+ + H2O <--> urate + NADH + H+ adenosine + H2O + H+ -> inosine + ammonium
			inosine + phosphate <--> hypoxanthine + a-D-ribose-1-phosphate
arginine dependent acid resistance	speA	127.395	L-arginine + H+ -> agmatine + CO2
cardiolipin biosynthesis I	pgpB, yfhb, pgpA, cls, pgsA, pssA	139.036	a CDP-diacylglycerol + sn-glycerol 3-phosphate -> CMP + a phosphatidylglycerophosphate + H+ 2 a phosphatidylglycerol -> a cardiolipin + glycerol
			a phosphatidylglycerophosphate + H2O -> a phosphatidylglycerol + phosphate
glycerol and glycerophosphodiester degradation	glpK, glpQ, ugpQ, glpD, glpC, glpB, glpA	240.817	glycerophosphodiester degradation glycerol degradation I
glycerol degradation I	glpK, glpD, glpC, glpB, glpA	278.071	glycerol[out] -> glycerol[in]
			sn-glycerol 3-phosphate[in] + an electron-transfer quinone[membrane] -> glycerone phosphate[in] + an electron-transfer quinol[membrane]
			glycerol + ATP -> sn-glycerol 3-phosphate + ADP + H+
indole-3-acetate biosynthesis VI (bacteria)	ipdC	190.205	(indol-3-yl)acetaldehyde + dioxygen + H2O -> (indol-3-yl)acetate + hydrogen peroxide + H+ (indol-3-yl)pyruvate + H+ -> CO2 + (indol-3-yl)acetaldehyde
			L-tryptophan + 2-oxoglutarate <--> (indol-3-yl)pyruvate + L-glutamate
L-arginine degradation IV (arginine decarboxylase/agmatine deiminase pathway)	speA, aguA, aguB	73.5514	N-carbamoylputrescine + 2 H+ + H2O -> putrescine + CO2 + ammonium agmatine + H2O -> ammonium + N-carbamoylputrescine
			L-arginine + H+ -> agmatine + CO2
L-lysine biosynthesis I	dapF, lysA, dapE, dapD, dapA, KP22_RS08070, KP22_RS11220, KP22_RS20145, KP22_RS12435, asd,	79.6996	(S)-2,3,4,5-tetrahydrodipicolinate + NAD(P)+ + H2O <- (2S,4S)-4-hydroxy-2,3,4,5-tetrahydrodipicolinate + NAD(P)H + H+
	thrA, lysC, KP22_RS19165, dapB		L-aspartate + ATP -> L-aspartyl-4-phosphate + ADP
			L-aspartate 4-semialdehyde + NADP+ + phosphate <--> L-aspartyl-4-phosphate + NADPH + H+ pyruvate + L-aspartate 4-semialdehyde -> (2S,4S)-4-hydroxy-2,3,4,5-tetrahydrodipicolinate + H2O + H+ (S)-2,3,4,5-tetrahydrodipicolinate + succinyl-CoA + H2O -> N-succinyl-2-amino-6-ketopimelate + coenzyme A
			N-succinyl-L,L-2,6-diaminopimelate + 2-oxoglutarate <--> N-succinyl-2-amino-6-ketopimelate + L-glutamate
			N-succinyl-L,L-2,6-diaminopimelate + H2O -> L,L-diaminopimelate + succinate
			meso-diaminopimelate + H+ -> L-lysine + CO2 L,L-diaminopimelate -> meso-diaminopimelate
NAD salvage pathway II (PNC IV cycle)	nadD, pncC, KP22_RS00615, nudC, nadE	75.9207	ammonium + ATP + nicotinate adenine dinucleotide -> AMP + NAD+ + diphosphate + H+ ATP + nicotinate adenine dinucleotide + L-glutamine + H2O -> L-glutamate + AMP + NAD+ + diphosphate + H+
			NAD+ + H2O -> AMP + b-nicotinamide D-ribonucleotide + 2 H+
			b-nicotinamide D-ribonucleotide + H2O -> ammonium + b-nicotinate D-ribonucleotide
			b-nicotinate D-ribonucleotide + ATP + H+ -> nicotinate adenine dinucleotide + diphosphate
purine deoxyribonucleosides degradation I	ppnP, deoD, add, yfiH	155.476	2’-deoxyadenosine + H2O + H+ -> 2’-deoxyinosine + ammonium
			2’-deoxyadenosine + phosphate <--> adenine + 2-deoxy-a-D-ribose 1-phosphate 2’-deoxyguanosine + phosphate <--> guanine + 2-deoxy-a-D-ribose 1-phosphate
			2’-deoxyinosine + phosphate <--> hypoxanthine + 2-deoxy-a-D-ribose 1-phosphate
purine nucleotides degradation II (aerobic)	add, guaD, guaB, KP22_RS10275, yrfG, ushA, ppnP, deoD, yfiH, xdhB, xdhA, xdhC	191.033	inosine 5’-phosphate degradation guanosine nucleotides degradation III adenosine nucleotides degradation II
purine ribonucleosides degradation	add, ppnP, deoD, yfiH, deoB	131.714	a-D-ribose-1-phosphate -> D-ribose 5-phosphate
			guanosine + phosphate <--> guanine + a-D-ribose-1-phosphate inosine + phosphate <--> hypoxanthine + a-D-ribose-1-phosphate adenosine + H2O + H+ -> inosine + ammonium
			adenosine + phosphate <--> adenine + a-D-ribose-1-phosphate
			xanthosine + phosphate <--> xanthine + a-D-ribose-1-phosphate
putrescine biosynthesis II	speA, aguA, aguB	73.5514	N-carbamoylputrescine + 2 H+ + H2O -> putrescine + CO2 + ammonium agmatine + H2O -> ammonium + N-carbamoylputrescine
			L-arginine + H+ -> agmatine + CO2
putrescine biosynthesis III	KP22_RS08255	90.0817	L-arginine + H2O -> urea + L-ornithine L-ornithine + H+ -> putrescine + CO2
superpathway of phospholipid biosynthesis III (E. coli)	asd, cdsA, gpsA, glpD, glpB, KP22_RS14995, plsB, plsY, pgsA, pssA, pgpB, yfhb, pgpA, cls	69.5178	cardiolipin biosynthesis III
			CDP-diacylglycerol biosynthesis II
			phosphatidylserine and phosphatidylethanolamine biosynthesis I cardiolipin biosynthesis I
			CDP-diacylglycerol biosynthesis I
superpathway of purine deoxyribonucleosides degradation	ppnP, deoD, add, yfiH, deoB, deoC, adhE	117.528	2-deoxy-a-D-ribose 1-phosphate degradation purine deoxyribonucleosides degradation I
tRNA charging	argS, cysS, glnS, gltX, ileS, leuS, KP22_RS13985, alaS, asnS, aspS, tyrS, trpS, thrS, serS, proS, hofC, pheT, pheS, lysS, hisS, glyS, glyQ, metG, KP22_RS16575, KP22_RS16570, KP22_RS16565, KP22_RS12145, KP22_RS12300, KP22_RS18720, KP22_RS07675, KP22_RS01005, KP22_RS01010, KP22_RS00995, KP22_RS21105, KP22_RS21060, KP22_RS09715, KP22_RS14010, KP22_RS07670, KP22_RS09365, KP22_RS09375, KP22_RS09595, K…	79.9755	initiator tRNAMet + L-methionine + ATP -> an L-methionyl-[initiator tRNAMet] + AMP + diphosphate a tRNAGly + glycine + ATP -> a glycyl-[tRNAGly] + AMP + diphosphate
			a tRNAHis + L-histidine + ATP -> an L-histidyl-[tRNAHis] + AMP + diphosphate L-lysine + a tRNALys + ATP -> an L-lysyl-[tRNALys] + AMP + diphosphate
			elongator tRNAMet + L-methionine + ATP -> an L-methionyl-[elongator tRNAMet] + AMP + diphosphate a tRNAPhe + L-phenylalanine + ATP -> an L-phenylalanyl-[tRNAPhe] + AMP + diphosphate
			a tRNAPro + L-proline + ATP -> an L-prolyl-[tRNAPro] + AMP + diphosphate a tRNAser + L-serine + ATP -> an L-seryl-[tRNAser] + AMP + diphosphate
			a tRNAThr + L-threonine + ATP -> an L-threonyl-[tRNAThr] + AMP + diphosphate
			L-tryptophan + a tRNATrp + ATP -> AMP + an L-tryptophanyl-[tRNATrp] + diphosphate a tRNATyr + L-tyrosine + ATP -> an L-tyrosyl-[tRNATyr] + AMP + diphosphate
			tRNAasp + L-aspartate + ATP -> an L-aspartyl-[tRNAasp] + AMP + diphosphate tRNAAsn + L-asparagine + ATP -> an L-asparaginyl-[tRNAAsn] + AMP + diphosphate a tRNAAla + L-alanine + ATP -> an L-alanyl-[tRNAAla] + AMP + diphosphate
			a tRNAVal + L-valine + ATP -> an L-valyl-[tRNAVal] + AMP + diphosphate
			a tRNALeu + L-leucine + ATP -> an L-leucyl-[tRNALeu] + AMP + diphosphate
			a tRNAIle + L-isoleucine + ATP -> an L-isoleucyl-[tRNAIle] + AMP + diphosphate a tRNAglu + L-glutamate + ATP -> an L-glutamyl-[tRNAGlu] + AMP + diphosphate
			a tRNAGln + L-glutamine + ATP -> an L-glutaminyl-[tRNAGln] + AMP + diphosphate a tRNACys + L-cysteine + ATP -> an L-cysteinyl-[tRNACys] + AMP + diphosphate
			a tRNAArg + L-arginine + ATP -> an L-arginyl-[tRNAArg] + AMP + diphosphate

## Sheet: Table S9
Table S9. Pathways found in P. betavasculorum NCPPB 2795 genome database after analysis against compounds detected in media samples supplemented with xylose. The analysis was performed with PathwayTools software.
Pathway	Genes	DPPS	Reaction-List
N-acetylglucosamine degradation II	nagK, nagB, nagA	28.9421	N-acetylglucosamine degradation I
			N-acetyl-D-glucosamine + ATP -> N-acetyl-D-glucosamine 6-phosphate + ADP + H+
D-mannose degradation I	manA, manX	69.8144	an [HPr protein]-Np-phospho-L-histidine + D-mannopyranose[out] -> D-mannopyranose 6-phosphate[in] + an [HPr]-L-histidine
			D-mannopyranose 6-phosphate -> b-D-fructofuranose 6-phosphate
D-mannose degradation II	manA, mak	69.8144	D-mannopyranose + ATP -> D-mannopyranose 6-phosphate + ADP + H+ D-mannopyranose 6-phosphate -> b-D-fructofuranose 6-phosphate
D-xylose degradation I	xylB, xylA	11.352	a-D-xylopyranose <--> a-D-xylulofuranose
			D-xylulose + ATP -> D-xylulose 5-phosphate + ADP + H+
glucose and glucose-1-phosphate degradation	yihX, pgm, deoB	347.888	D-glucopyranose[out] + a ubiquinone[inner membrane] -> D-glucono-1,5-lactone[out] + a ubiquinol[inner
			membrane]
			D-glucopyranose + ATP -> D-glucopyranose 6-phosphate + ADP + H+
			a-D-glucopyranose 1-phosphate <--> D-glucopyranose 6-phosphate D-glucono-1,5-lactone + H2O -> D-gluconate + H+
			a-D-glucopyranose 1-phosphate + H2O -> D-glucopyranose + phosphate
glycogen degradation I	malQ, glgX, KP22_RS06865, KP22_RS14475, pgm, deoB, malP, glgP	275.03	a debranched a-limit dextrin + n phosphate -> maltotriose + n a-D-glucopyranose 1-phosphate maltotetraose + phosphate -> maltotriose + a-D-glucopyranose 1-phosphate
			D-glucopyranose + ATP -> D-glucopyranose 6-phosphate + ADP + H+
			a-D-glucopyranose 1-phosphate <--> D-glucopyranose 6-phosphate maltotriose + H2O -> maltose + D-glucopyranose
			an a-limit dextrin + H2O -> maltotetraose + a debranched a-limit dextrin
			a glycogen + n phosphate -> an a-limit dextrin + n a-D-glucopyranose 1-phosphate maltotetraose + D-glucopyranose <--> maltotriose + maltose
glycogen degradation II	malP, glgP, pgm, deoB, malQ	211.718	D-glucopyranose + ATP -> D-glucopyranose 6-phosphate + ADP + H+ an a-limit dextrin -> a debranched a-limit dextrin
			a-D-glucopyranose 1-phosphate <--> D-glucopyranose 6-phosphate a debranched a-limit dextrin + n H2O -> n D-glucopyranose
			a debranched a-limit dextrin + n phosphate -> n a-D-glucopyranose 1-phosphate
			a glycogen + n phosphate -> an a-limit dextrin + n a-D-glucopyranose 1-phosphate
glycolysis I (from glucose 6-phosphate)	pykF, pyk, eno, pgk, gapA, tpiA, fbaA, pfkA, KP22_RS04580, pgi, kduI, ppsA, fbp, glpX, gpmA, gpmB, crr, ptsG	71.917	an [HPr protein]-Np-phospho-L-histidine + D-glucopyranose[out] -> D-glucopyranose 6-phosphate[in] + an [HPr]-L-histidine
			2-phospho-D-glycerate <--> 3-phospho-D-glycerate
			b-D-fructofuranose 1,6-bisphosphate + H2O -> b-D-fructofuranose 6-phosphate + phosphate pyruvate + ATP + H2O <--> phosphoenolpyruvate + AMP + phosphate + 2 H+
			a-D-glucose 6-phosphate <--> b-D-fructofuranose 6-phosphate
			ATP + b-D-fructofuranose 6-phosphate -> ADP + b-D-fructofuranose 1,6-bisphosphate + H+
			b-D-fructofuranose 1,6-bisphosphate <--> glycerone phosphate + D-glyceraldehyde 3-phosphate D-glyceraldehyde 3-phosphate <--> glycerone phosphate
			D-glyceraldehyde 3-phosphate + NAD+ + phosphate <--> 3-phospho-D-glyceroyl phosphate + NADH + H+
			3-phospho-D-glycerate + ATP <--> 3-phospho-D-glyceroyl phosphate + ADP 2-phospho-D-glycerate <--> 3-phospho-D-glycerate
			2-phospho-D-glycerate <--> phosphoenolpyruvate + H2O pyruvate + ATP <- phosphoenolpyruvate + ADP + H+
guanine and guanosine salvage II	hpt, gpt	9.20542	guanosine + H2O -> D-ribofuranose + guanine
			GMP + diphosphate <- guanine + 5-phospho-a-D-ribose 1-diphosphate
indole-3-acetate biosynthesis VI (bacteria)	ipdC	139.816	(indol-3-yl)acetaldehyde + dioxygen + H2O -> (indol-3-yl)acetate + hydrogen peroxide + H+ (indol-3-yl)pyruvate + H+ -> CO2 + (indol-3-yl)acetaldehyde
			L-tryptophan + 2-oxoglutarate <--> (indol-3-yl)pyruvate + L-glutamate
L-histidine degradation II	hutU, hutI, KP22_RS16825, hutG	125.158	N-formyl-L-glutamate + H2O -> L-glutamate + formate
			N-formimino-L-glutamate + H2O -> ammonium + N-formyl-L-glutamate 4-imidazolone-5-propanoate + H2O -> N-formimino-L-glutamate
			4-imidazolone-5-propanoate <- urocanate + H2O L-histidine -> ammonium + urocanate
lactose degradation III	KP22_RS16775	259.301	lactose + H2O -> D-glucopyranose
peptidoglycan recycling I	murQ, anmK, nagZ, KP22_RS03030, amiC, ampD, amiB, nagA, glmM, glmU, mepS, mpl, murA, murB, mltG, mltC, mltB, mltF	13.3976	a mature peptidoglycan (meso-DAP containing) -> GlcNAc-1,6-anhMurNAc-L-Ala-g-D-Glu-meso
			-DAP-D-Ala + a mature peptidoglycan(n-1) (meso-DAP containing)
			GlcNAc-1,6-anhMurNAc-L-Ala-g-D-Glu-meso-DAP-D-Ala[out] + H+[out] <--> GlcNAc-1,6-anhMurNAc-L-Ala-g
			-D-Glu-meso-DAP-D-Ala[in] + H+[in]
			UDP-N-acetyl-a-D-muramate + NADP+ <- UDP-N-acetyl-a-D-glucosamine-enolpyruvate + NADPH + H+ UDP-N-acetyl-a-D-glucosamine + phosphoenolpyruvate -> UDP-N-acetyl-a
			-D-glucosamine-enolpyruvate + phosphate
			UDP-N-acetyl-a-D-muramate + L-alanyl-g-D-glutamyl-meso-diaminopimelate + ATP -> UDP-MurNAc-L-Ala-g-D-Glu-meso-DAP + ADP + phosphate + H+
			L-alanyl-g-D-glutamyl-meso-2,6-diaminopimeloyl-D-alanine + H2O -> L-alanyl-g-D-glutamyl-meso
			-diaminopimelate + D-alanine
			UTP + N-acetyl-a-D-glucosamine 1-phosphate + H+ -> UDP-N-acetyl-a-D-glucosamine + diphosphate acetyl-CoA + a-D-glucosamine 1-phosphate -> N-acetyl-a-D-glucosamine 1-phosphate + coenzyme A + H+
			D-glucosamine 6-phosphate <--> a-D-glucosamine 1-phosphate
			N-acetyl-D-glucosamine 6-phosphate + H2O -> D-glucosamine 6-phosphate + acetate GlcNAc-1,6-anhMurNAc-L-Ala-g-D-Glu-meso-DAP-D-Ala + H2O -> N-acetyl-b
			-D-glucosamine-1,6-anhydro-N-acetyl-b-D-muramate + L-alanyl-g-D-glutamyl-meso
			-2,6-diaminopimeloyl-D-alanine
			N-acetyl-b-D-glucosamine-1,6-anhydro-N-acetyl-b-D-muramate + H2O -> N-acetyl-D-glucosamine + 1,6-anhydro-N-acetyl-b-D-muramate
			1,6-anhydro-N-acetyl-b-D-muramate + ATP + H2O -> N-acetyl-D-muramate 6-phosphate + ADP + H+
			N-acetyl-D-muramate 6-phosphate + H2O <--> N-acetyl-D-glucosamine 6-phosphate + (R)-lactate
ribose phosphorylation	rbsK, rbsK, rbsD	7.67405	b-D-ribopyranose -> b-D-ribofuranose
			D-ribofuranose + ATP -> D-ribofuranose 5-phosphate + ADP + H+
sucrose degradation I (sucrose phosphotransferase)	KP22_RS13795, mak, KP22_RS13800	83.8153	an [HPr protein]-Np-phospho-L-histidine + sucrose[out] -> an [HPr]-L-histidine + sucrose 6G-phosphate
			[in]
			b-D-fructofuranose + ATP -> b-D-fructofuranose 6-phosphate + ADP + H+ sucrose 6G-phosphate + H2O -> b-D-glucose 6-phosphate + b-D-fructofuranose
sucrose degradation III (sucrose invertase)	mak, pgi, kduI, KP22_RS13795	259.301	sucrose + H2O -> b-D-fructofuranose + D-glucopyranose
			D-glucopyranose + ATP -> D-glucopyranose 6-phosphate + ADP + H+
			a-D-glucose 6-phosphate <--> b-D-fructofuranose 6-phosphate
			b-D-fructofuranose + ATP -> b-D-fructofuranose 6-phosphate + ADP + H+
superpathway of glycolysis, pyruvate dehydrogenase, TCA, and glyoxylate bypass	aceB, aceA, fumC, fumA, sucD, sucC, sucA, KP22_RS01145, KP22_RS13325, acnA, acnB, mqo, icd, KP22_RS02155, mdh, KP22_RS03655, KP22_RS01890, KP22_RS01165, sdhC, frdA, frdC, frdD, sdhD,	53.2088	pyruvate + coenzyme A + NAD+ -> acetyl-CoA + CO2 + NADH glycolysis I (from glucose 6-phosphate)
	pykF, pyk, eno, pgk, gapA, tpiA, fbaA, pfkA, KP22_RS04580, pgi, kduI, ppsA, fbp, glpX, gpmA, gpmB, crr		superpathway of glyoxylate bypass and TCA
	, ptsG, aceF
trehalose biosynthesis I	KP22_RS04535, otsB	215.262	a,a-trehalose 6-phosphate + H2O -> a,a-trehalose + phosphate
			UDP-a-D-glucose + D-glucopyranose 6-phosphate -> a,a-trehalose 6-phosphate + UDP + H+
trehalose degradation I (low osmolarity)	treC	366.706	D-glucopyranose + ATP -> D-glucopyranose 6-phosphate + ADP + H+
			a,a-trehalose 6-phosphate + H2O -> D-glucopyranose 6-phosphate + D-glucopyranose
UMP biosynthesis I	carB, carA, pyrB, pyrI, pyrC, pyrE, pyrF, pyrD	7.35173	(S)-dihydroorotate[in] + an electron-transfer quinone[membrane] -> orotate[in] + an electron-transfer quinol
			[membrane]
			orotidine 5’-phosphate + H+ -> UMP + CO2
			orotidine 5’-phosphate + diphosphate <- 5-phospho-a-D-ribose 1-diphosphate + orotate (S)-dihydroorotate + H2O <- N-carbamoyl-L-aspartate + H+
			L-aspartate + carbamoyl phosphate -> N-carbamoyl-L-aspartate + phosphate + H+
			2 ATP + L-glutamine + hydrogencarbonate + H2O -> L-glutamate + carbamoyl phosphate + 2 ADP + phosphate + 2 H+
